# Supplementary material for: Meta- and cross-species analyses of insulin resistance based on gene expression datasets in human white adipose tissues
Source: PubMed Central journal article supplement (PMC5829071; doi:10.1038/s41598-017-18082-7), 2018-02-27
Supplement: 41598_2017_18082_MOESM1_ESM.pdf [file 41598_2017_18082_MOESM1_ESM.pdf]

## Supplementary Information

### **Meta- and cross-species analyses of insulin resistance based on gene expression datasets in human white adipose tissues**

Junghyun Jung<sup>1</sup>, Go Woon Kim<sup>2</sup>, Woosuk Lee<sup>1</sup>, Changsoo Mok<sup>1</sup>, Sung Hyun Chung<sup>2</sup>, Wonhee Jang<sup>1\*</sup>

1. *Department of Life Science, Dongguk University, Pildong 3-ga, Seoul, Korea 04620*
2. *Department of Pharmacology, College of Pharmacy, Kyung Hee University, 26 Kyunghedae-ro, Seoul, Korea 02447*

Figure S1. An overview of the analysis workflow.

Figure S2. Functional enrichment analysis using GSEA.

Figure S3. Correlation analysis of BMI, HOMA2, and Z-scores of drug signature.

Figure S4. Z-scores of each study and the meta-analysis.

Table S1. The identified human IR meta-signature.

Table S2. The identified cross-species drug signature.

**Figure S1. An overview of the analysis workflow.**

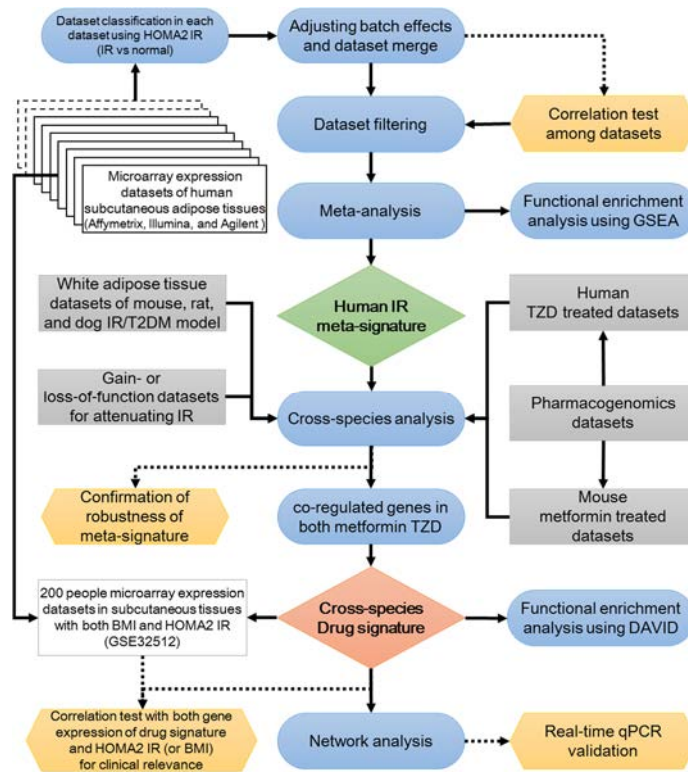

The scheme of meta-analysis and cross-species analysis procedures used to identify robust genetic markers and potential therapeutic target genes involved in IR are shown. The blank boxes denote the microarray datasets used for meta-analysis in human subcutaneous adipose tissue except for two microarray datasets represented by the dotted blank box that were removed from the analysis. The blue eclipses denote the analysis steps and the diamonds indicate signature genes involved in insulin resistance and potential therapeutic targets. The grey boxes indicate other expression microarray datasets used to confirm the robustness of human IR meta-signature and to identify cross-species drug signature, and the solid arrows indicate the direction of analysis. The yellow hexagons denote the validation step and the dashed arrow lines represent the direction of the validation step.

Figure S2. Functional enrichment analysis using GSEA.

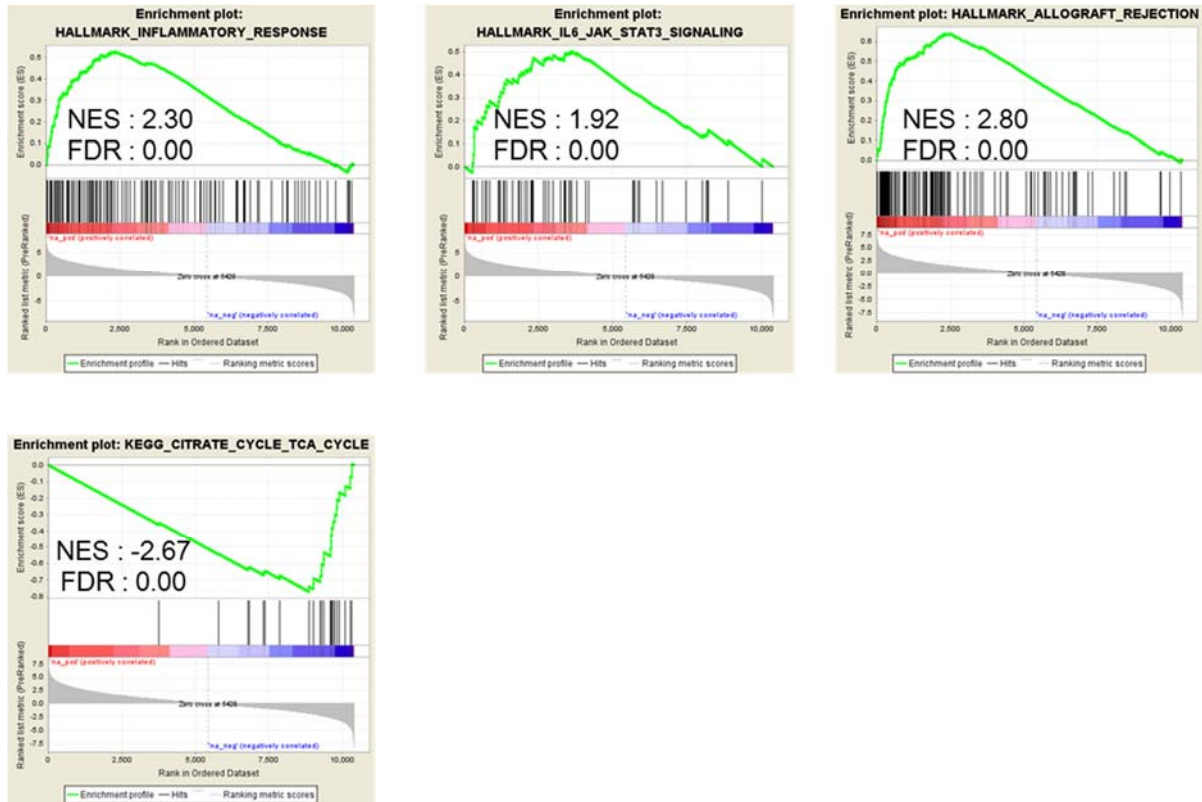

GSEA results obtained using meta-analysis Z-scores and both KEGG and MSigDB hallmark gene sets.

Figure S3. Correlation analysis of BMI, HOMA2, and Z-scores of drug signature.

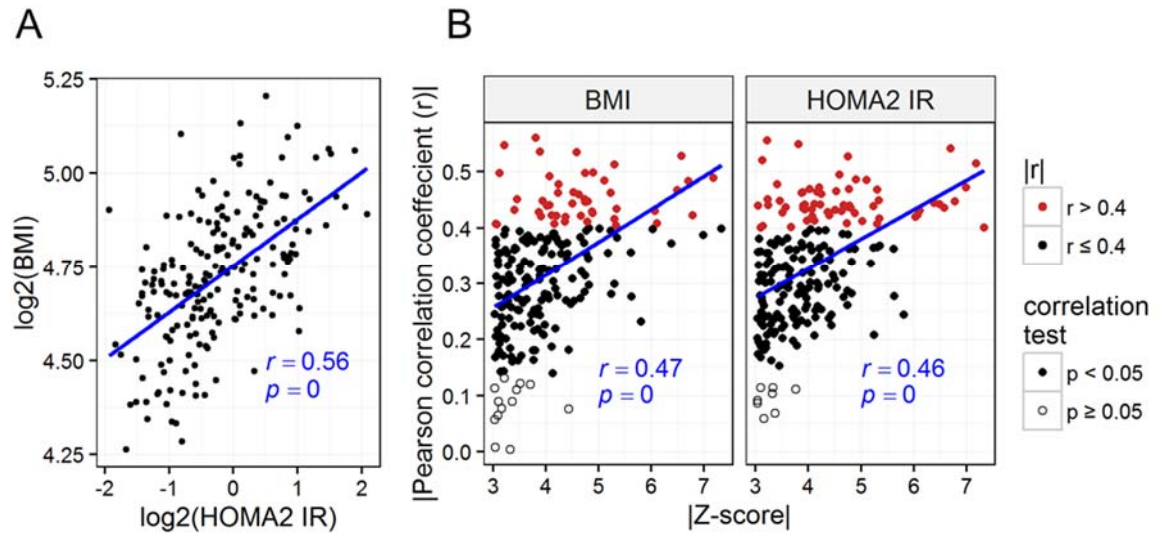

(A) Correlation analysis between HOMA2-IR and BMI based on 200 subjects using the GSE32512 datasets. (B) Correlation analysis of BMI, HOMA2-IR, and Z-scores. The y-axis shows the absolute value of the correlation coefficient between the expression levels of 211 drug signature and HOMA2-IR or BMI. The x-axis shows the absolute value of the 211 drug signature's Z-scores.

**Figure S4. Z-scores of each study and the meta-analysis.**

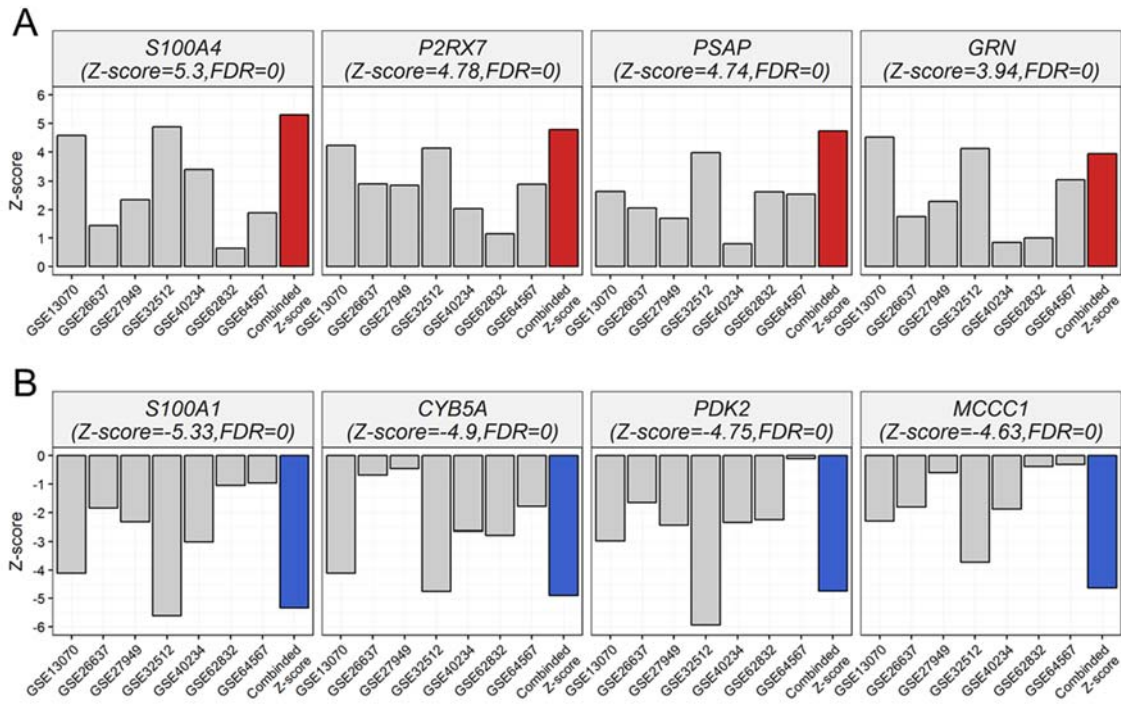

(A) Up- and (B) down-regulated drug signature's Z-scores in each study and in the meta-analysis for genes identified by network analysis (Fig. 8A).

**Table S1. The identified human IR meta-signatures.**

| Gene id | Symbol   | Gene name                                                     | Z-score | FDR       |
|---------|----------|---------------------------------------------------------------|---------|-----------|
| 7422    | VEGFA    | vascular endothelial growth factor A                          | -8.34   | 0.00.E+00 |
| 8714    | ABCC3    | ATP binding cassette subfamily C member 3                     | 7.89    | 0.00.E+00 |
| 1890    | TYMP     | thymidine phosphorylase                                       | 7.85    | 0.00.E+00 |
| 23171   | GPD1L    | glycerol-3-phosphate dehydrogenase 1-like                     | -7.80   | 0.00.E+00 |
| 152007  | GLIPR2   | GLI pathogenesis related 2                                    | 7.52    | 0.00.E+00 |
| 10157   | AASS     | aminoadipate-semialdehyde synthase                            | -7.41   | 0.00.E+00 |
| 8870    | IER3     | immediate early response 3                                    | 7.33    | 0.00.E+00 |
| 338     | APOB     | apolipoprotein B                                              | -7.25   | 0.00.E+00 |
| 894     | CCND2    | cyclin D2                                                     | 7.18    | 0.00.E+00 |
| 1979    | EIF4EBP2 | eukaryotic translation initiation factor 4E binding protein 2 | -7.18   | 0.00.E+00 |
| 563     | AZGP1    | alpha-2-glycoprotein 1, zinc-binding                          | -7.16   | 0.00.E+00 |
| 7291    | TWIST1   | twist family bHLH transcription factor 1                      | -7.13   | 0.00.E+00 |
| 347733  | TUBB2B   | tubulin beta 2B class IIb                                     | 7.13    | 0.00.E+00 |
| 6678    | SPARC    | secreted protein acidic and cysteine rich                     | 7.05    | 0.00.E+00 |
| 11043   | MID2     | midline 2                                                     | -6.99   | 0.00.E+00 |
| 1175    | AP2S1    | adaptor related protein complex 2 sigma 1 subunit             | 6.81    | 0.00.E+00 |
| 80763   | SPX      | spexin hormone                                                | -6.80   | 0.00.E+00 |
| 56301   | SLC7A10  | solute carrier family 7 member 10                             | -6.78   | 0.00.E+00 |
| 4337    | MOCS1    | molybdenum cofactor synthesis 1                               | -6.70   | 0.00.E+00 |
| 83861   | RSPH3    | radial spoke 3 homolog                                        | 6.70    | 0.00.E+00 |
| 7100    | TLR5     | toll like receptor 5                                          | 6.69    | 0.00.E+00 |
| 2752    | GLUL     | glutamate-ammonia ligase                                      | -6.67   | 0.00.E+00 |
| 84868   | HAVCR2   | hepatitis A virus cellular receptor 2                         | 6.65    | 0.00.E+00 |
| 51660   | MPC1     | mitochondrial pyruvate carrier 1                              | -6.59   | 0.00.E+00 |
| 8682    | PEA15    | phosphoprotein enriched in astrocytes 15                      | 6.58    | 0.00.E+00 |
| 25975   | EGFL6    | EGF like domain multiple 6                                    | 6.58    | 0.00.E+00 |
| 8644    | AKR1C3   | aldo-keto reductase family 1 member C3                        | 6.57    | 0.00.E+00 |
| 3075    | CFH      | complement factor H                                           | 6.55    | 0.00.E+00 |
| 23258   | DENND5A  | DENN domain containing 5A                                     | 6.53    | 0.00.E+00 |
| 80301   | PLEKHO2  | pleckstrin homology domain containing O2                      | 6.50    | 0.00.E+00 |
| 3952    | LEP      | leptin                                                        | 6.49    | 0.00.E+00 |
| 64756   | ATPAF1   | ATP synthase mitochondrial F1 complex assembly factor 1       | -6.38   | 0.00.E+00 |
| 340348  | TSPAN33  | tetraspanin 33                                                | 6.35    | 0.00.E+00 |
| 8777    | MPDZ     | multiple PDZ domain crumbs cell polarity complex component    | -6.32   | 0.00.E+00 |
| 813     | CALU     | calumenin                                                     | 6.29    | 0.00.E+00 |
| 1536    | CYBB     | cytochrome b-245 beta chain                                   | 6.28    | 0.00.E+00 |
| 390     | RND3     | Rho family GTPase 3                                           | 6.12    | 0.00.E+00 |
| 3929    | LBP      | lipopolysaccharide binding protein                            | 6.11    | 0.00.E+00 |
| 1475    | CSTA     | cystatin A                                                    | 6.10    | 0.00.E+00 |
| 2650    | GCNT1    | glucosaminyl (N-acetyl) transferase 1, core 2                 | 6.07    | 0.00.E+00 |
| 57698   | SHTN1    | shootin 1                                                     | 6.06    | 0.00.E+00 |
| 5216    | PFN1     | profilin 1                                                    | 6.03    | 0.00.E+00 |
| 201161  | CENPV    | centromere protein V                                          | -6.02   | 0.00.E+00 |
| 114548  | NLRP3    | NLR family pyrin domain containing 3                          | 6.01    | 0.00.E+00 |
| 3033    | HADH     | hydroxyacyl-CoA dehydrogenase                                 | -5.99   | 0.00.E+00 |
| 10655   | DMRT2    | doublesex and mab-3 related transcription factor 2            | -5.98   | 0.00.E+00 |
| 151306  | GPBAR1   | G protein-coupled bile acid receptor 1                        | 5.95    | 0.00.E+00 |
| 51222   | ZNF219   | zinc finger protein 219                                       | 5.94    | 0.00.E+00 |
| 4145    | MATK     | megakaryocyte-associated tyrosine kinase                      | 5.93    | 0.00.E+00 |
| 1522    | CTSZ     | cathepsin Z                                                   | 5.90    | 0.00.E+00 |
| 3693    | ITGB5    | integrin subunit beta 5                                       | 5.88    | 0.00.E+00 |
| 6309    | SC5D     | sterol-C5-desaturase                                          | -5.88   | 0.00.E+00 |
| 54732   | TMED9    | transmembrane p24 trafficking protein 9                       | 5.86    | 0.00.E+00 |
| 255631  | COL24A1  | collagen type XXIV alpha 1 chain                              | 5.86    | 0.00.E+00 |
| 977     | CD151    | CD151 molecule (Raph blood group)                             | 5.85    | 0.00.E+00 |
| 4883    | NPR3     | natriuretic peptide receptor 3                                | 5.85    | 0.00.E+00 |
| 284021  | MILR1    | mast cell immunoglobulin like receptor 1                      | 5.85    | 0.00.E+00 |
| 55787   | TXLNG    | taxilin gamma                                                 | -5.84   | 0.00.E+00 |
| 7108    | TM7SF2   | transmembrane 7 superfamily member 2                          | -5.84   | 0.00.E+00 |
| 55283   | MCOLN3   | mucolipin 3                                                   | -5.82   | 0.00.E+00 |
| 9051    | PSTPIP1  | proline-serine-threonine phosphatase interacting protein 1    | 5.81    | 0.00.E+00 |
| 54976   | C20orf27 | chromosome 20 open reading frame 27                           | -5.79   | 0.00.E+00 |
| 87      | ACTN1    | actin alpha 1                                                 | 5.77    | 0.00.E+00 |
| 7385    | UQCRC2   | ubiquinol-cytochrome c reductase core protein II              | -5.77   | 0.00.E+00 |
| 59338   | PLEKHA1  | pleckstrin homology domain containing A1                      | 5.76    | 0.00.E+00 |

|        |         |                                                              |       |           |
|--------|---------|--------------------------------------------------------------|-------|-----------|
| 85477  | SCIN    | scinderin                                                    | 5.75  | 0.00.E+00 |
| 2675   | GFRA2   | GDNF family receptor alpha 2                                 | 5.75  | 0.00.E+00 |
| 7739   | ZNF185  | zinc finger protein 185 (LIM domain)                         | 5.74  | 0.00.E+00 |
| 549    | AUH     | AU RNA binding methylglutaconyl-CoA hydratase                | -5.74 | 0.00.E+00 |
| 8204   | NRIP1   | nuclear receptor interacting protein 1                       | -5.71 | 0.00.E+00 |
| 5092   | PCBD1   | pterin-4 alpha-carbinolamine dehydratase 1                   | -5.70 | 0.00.E+00 |
| 5774   | PTPN3   | protein tyrosine phosphatase, non-receptor type 3            | -5.70 | 0.00.E+00 |
| 115416 | MALSU1  | mitochondrial assembly of ribosomal large subunit 1          | -5.68 | 0.00.E+00 |
| 11006  | LILRB4  | leukocyte immunoglobulin like receptor B4                    | 5.68  | 0.00.E+00 |
| 51313  | FAM198B | family with sequence similarity 198 member B                 | 5.65  | 0.00.E+00 |
| 1026   | CDKN1A  | cyclin dependent kinase inhibitor 1A                         | 5.64  | 0.00.E+00 |
| 3309   | HSPA5   | heat shock protein family A (Hsp70) member 5                 | 5.63  | 0.00.E+00 |
| 91461  | PKDCC   | protein kinase domain containing, cytoplasmic                | -5.63 | 0.00.E+00 |
| 3791   | KDR     | kinase insert domain receptor                                | -5.63 | 0.00.E+00 |
| 1959   | EGR2    | early growth response 2                                      | 5.62  | 0.00.E+00 |
| 6623   | SNCG    | synuclein gamma                                              | 5.60  | 0.00.E+00 |
| 1880   | GPR183  | G protein-coupled receptor 183                               | 5.60  | 0.00.E+00 |
| 5707   | PSMD1   | proteasome 26S subunit, non-ATPase 1                         | 5.60  | 0.00.E+00 |
| 94103  | ORMDL3  | ORMDL sphingolipid biosynthesis regulator 3                  | -5.58 | 0.00.E+00 |
| 2028   | ENPEP   | glutamyl aminopeptidase                                      | -5.58 | 0.00.E+00 |
| 27147  | DENND2A | DENN domain containing 2A                                    | -5.57 | 0.00.E+00 |
| 9469   | CHST3   | carbohydrate sulfotransferase 3                              | 5.57  | 0.00.E+00 |
| 3667   | IRS1    | insulin receptor substrate 1                                 | -5.53 | 0.00.E+00 |
| 9194   | SLC16A7 | solute carrier family 16 member 7                            | -5.51 | 0.00.E+00 |
| 7345   | UCHL1   | ubiquitin C-terminal hydrolase L1                            | 5.51  | 0.00.E+00 |
| 28973  | MRPS18B | mitochondrial ribosomal protein S18B                         | -5.50 | 0.00.E+00 |
| 54463  | FAM134B | family with sequence similarity 134 member B                 | -5.50 | 0.00.E+00 |
| 9956   | HS3ST2  | heparan sulfate-glucosamine 3-sulfotransferase 2             | 5.50  | 0.00.E+00 |
| 408    | ARRB1   | arrestin beta 1                                              | -5.49 | 0.00.E+00 |
| 284    | ANGPT1  | angiopoietin 1                                               | 5.47  | 0.00.E+00 |
| 54958  | TMEM160 | transmembrane protein 160                                    | 5.47  | 0.00.E+00 |
| 34     | ACADM   | acyl-CoA dehydrogenase, C-4 to C-12 straight chain           | -5.46 | 0.00.E+00 |
| 9326   | ZNHIT3  | zinc finger HIT-type containing 3                            | -5.45 | 0.00.E+00 |
| 29992  | PILRA   | paired immunoglobulin like type 2 receptor alpha             | 5.44  | 0.00.E+00 |
| 7037   | TFRC    | transferrin receptor                                         | 5.43  | 0.00.E+00 |
| 51726  | DNAJB11 | DnaJ heat shock protein family (Hsp40) member B11            | 5.40  | 0.00.E+00 |
| 3914   | LAMB3   | laminin subunit beta 3                                       | 5.40  | 0.00.E+00 |
| 113675 | SDSL    | serine dehydratase like                                      | 5.39  | 0.00.E+00 |
| 6920   | TCEA3   | transcription elongation factor A3                           | -5.38 | 0.00.E+00 |
| 5996   | RGS1    | regulator of G-protein signaling 1                           | 5.36  | 0.00.E+00 |
| 595    | CCND1   | cyclin D1                                                    | 5.36  | 0.00.E+00 |
| 10783  | NEK6    | NIMA related kinase 6                                        | 5.36  | 0.00.E+00 |
| 57552  | NCEH1   | neutral cholesterol ester hydrolase 1                        | 5.35  | 0.00.E+00 |
| 316    | AOX1    | aldehyde oxidase 1                                           | 5.35  | 0.00.E+00 |
| 83943  | IMMP2L  | inner mitochondrial membrane peptidase subunit 2             | -5.35 | 0.00.E+00 |
| 116843 | SLC18B1 | solute carrier family 18 member B1                           | 5.34  | 0.00.E+00 |
| 10272  | FSTL3   | follistatin like 3                                           | 5.34  | 0.00.E+00 |
| 6271   | S100A1  | S100 calcium binding protein A1                              | -5.33 | 0.00.E+00 |
| 27287  | VENTX   | VENT homeobox                                                | 5.32  | 0.00.E+00 |
| 8444   | DYRK3   | dual specificity tyrosine phosphorylation regulated kinase 3 | -5.32 | 0.00.E+00 |
| 128553 | TSHZ2   | teashirt zinc finger homeobox 2                              | 5.32  | 0.00.E+00 |
| 7481   | WNT11   | Wnt family member 11                                         | -5.31 | 0.00.E+00 |
| 2872   | MKNK2   | MAP kinase interacting serine/threonine kinase 2             | -5.31 | 0.00.E+00 |
| 3704   | ITPA    | inosine triphosphatase                                       | 5.30  | 0.00.E+00 |
| 6275   | S100A4  | S100 calcium binding protein A4                              | 5.30  | 0.00.E+00 |
| 10533  | ATG7    | autophagy related 7                                          | 5.29  | 0.00.E+00 |
| 134266 | GRPEL2  | GrpE like 2, mitochondrial                                   | -5.29 | 0.00.E+00 |
| 2817   | GPC1    | glypican 1                                                   | 5.29  | 0.00.E+00 |
| 1601   | DAB2    | DAB2, clathrin adaptor protein                               | 5.27  | 8.06.E-06 |
| 64102  | TNMD    | tenomodulin                                                  | 5.26  | 8.00.E-06 |
| 153579 | BTNL9   | butyrophilin like 9                                          | -5.25 | 7.94.E-06 |
| 4329   | ALDH6A1 | aldehyde dehydrogenase 6 family member A1                    | -5.23 | 7.87.E-06 |
| 28999  | KLF15   | Kruppel like factor 15                                       | -5.23 | 7.81.E-06 |
| 393    | ARHGAP4 | Rho GTPase activating protein 4                              | 5.21  | 7.75.E-06 |
| 57124  | CD248   | CD248 molecule                                               | 5.21  | 7.69.E-06 |
| 54602  | NDFIP2  | Nedd4 family interacting protein 2                           | -5.20 | 7.63.E-06 |
| 8495   | PPFIBP2 | PPFIA binding protein 2                                      | 5.19  | 7.58.E-06 |

|        |           |                                                           |       |           |
|--------|-----------|-----------------------------------------------------------|-------|-----------|
| 79709  | COLGALT1  | collagen beta(1-O)galactosyltransferase 1                 | 5.19  | 7.52.E-06 |
| 594    | BCKDHB    | branched chain keto acid dehydrogenase E1 subunit beta    | -5.18 | 7.46.E-06 |
| 23022  | PALLD     | palladin, cytoskeletal associated protein                 | 5.18  | 7.41.E-06 |
| 9833   | MELK      | maternal embryonic leucine zipper kinase                  | 5.18  | 7.35.E-06 |
| 35     | ACADS     | acyl-CoA dehydrogenase, C-2 to C-3 short chain            | -5.15 | 7.30.E-06 |
| 27350  | APOBEC3C  | apolipoprotein B mRNA editing enzyme catalytic subunit 3C | 5.15  | 7.25.E-06 |
| 2119   | ETV5      | ETS variant 5                                             | 5.15  | 7.19.E-06 |
| 3003   | GZMK      | granzyme K                                                | 5.12  | 7.14.E-06 |
| 54665  | RSBN1     | round spermatid basic protein 1                           | -5.11 | 1.42.E-05 |
| 6448   | SGSH      | N-sulfoglucosamine sulfohydrolase                         | 5.11  | 1.41.E-05 |
| 5827   | PXMP2     | peroxisomal membrane protein 2                            | -5.11 | 1.40.E-05 |
| 90768  | LOC90768  | uncharacterized LOC90768                                  | -5.11 | 1.39.E-05 |
| 1845   | DUSP3     | dual specificity phosphatase 3                            | 5.11  | 1.38.E-05 |
| 83606  | GUCD1     | guanylyl cyclase domain containing 1                      | -5.10 | 1.37.E-05 |
| 3687   | ITGAX     | integrin subunit alpha X                                  | 5.09  | 1.36.E-05 |
| 10003  | NAALAD2   | N-acetylated alpha-linked acidic dipeptidase 2            | -5.08 | 1.35.E-05 |
| 5715   | PSMD9     | proteasome 26S subunit, non-ATPase 9                      | 5.08  | 1.34.E-05 |
| 201164 | PLD6      | phospholipase D family member 6                           | -5.05 | 1.33.E-05 |
| 9242   | MSC       | musculin                                                  | 5.05  | 1.32.E-05 |
| 196740 | VSTM4     | V-set and transmembrane domain containing 4               | -5.05 | 1.32.E-05 |
| 8832   | CD84      | CD84 molecule                                             | 5.05  | 1.31.E-05 |
| 25805  | BAMBI     | BMP and activin membrane bound inhibitor                  | 5.04  | 1.30.E-05 |
| 56997  | COQ8A     | coenzyme Q8A                                              | -5.04 | 1.29.E-05 |
| 4982   | TNFRSF11B | TNF receptor superfamily member 11b                       | 5.03  | 1.28.E-05 |
| 716    | C1S       | complement C1s                                            | 5.03  | 1.27.E-05 |
| 7941   | PLA2G7    | phospholipase A2 group VII                                | 5.02  | 1.27.E-05 |
| 23507  | LRRC8B    | leucine rich repeat containing 8 family member B          | -5.01 | 1.26.E-05 |
| 27128  | CYTH4     | cytohesin 4                                               | 4.99  | 2.50.E-05 |
| 8801   | SUCLG2    | succinate-CoA ligase GDP-forming beta subunit             | -4.98 | 2.48.E-05 |
| 29091  | STXBP6    | syntaxin binding protein 6                                | -4.98 | 2.47.E-05 |
| 64420  | SUSD1     | sushi domain containing 1                                 | 4.97  | 2.45.E-05 |
| 9500   | MAGED1    | MAGE family member D1                                     | 4.97  | 2.44.E-05 |
| 80760  | ITIH5     | inter-alpha-trypsin inhibitor heavy chain family member 5 | 4.96  | 3.64.E-05 |
| 114804 | RNF157    | ring finger protein 157                                   | -4.96 | 3.61.E-05 |
| 10269  | ZMPSTE24  | zinc metalloproteinase STE24                              | 4.96  | 3.59.E-05 |
| 432    | ASGR1     | asialoglycoprotein receptor 1                             | 4.95  | 3.57.E-05 |
| 945    | CD33      | CD33 molecule                                             | 4.94  | 4.14.E-05 |
| 254428 | SLC41A1   | solute carrier family 41 member 1                         | -4.93 | 4.12.E-05 |
| 55183  | RIF1      | replication timing regulatory factor 1                    | -4.93 | 4.09.E-05 |
| 2535   | FZD2      | frizzled class receptor 2                                 | 4.93  | 4.07.E-05 |
| 23423  | TMED3     | transmembrane p24 trafficking protein 3                   | 4.93  | 4.05.E-05 |
| 9353   | SLIT2     | slit guidance ligand 2                                    | 4.92  | 4.02.E-05 |
| 54539  | NDUFB11   | NADH:ubiquinone oxidoreductase subunit B11                | -4.92 | 4.57.E-05 |
| 11031  | RAB31     | RAB31, member RAS oncogene family                         | 4.92  | 4.55.E-05 |
| 4702   | NDUFA8    | NADH:ubiquinone oxidoreductase subunit A8                 | -4.91 | 4.52.E-05 |
| 5737   | PTGFR     | prostaglandin F receptor                                  | 4.91  | 4.49.E-05 |
| 23753  | SDF2L1    | stromal cell derived factor 2 like 1                      | 4.91  | 4.47.E-05 |
| 81552  | VOPP1     | vesicular, overexpressed in cancer, prosurvival protein 1 | 4.91  | 4.44.E-05 |
| 57419  | SLC24A3   | solute carrier family 24 member 3                         | 4.91  | 4.42.E-05 |
| 152189 | CMTM8     | CKLF like MARVEL transmembrane domain containing 8        | -4.91 | 4.40.E-05 |
| 10203  | CALCRL    | calcitonin receptor like receptor                         | -4.91 | 4.37.E-05 |
| 151887 | CCDC80    | coiled-coil domain containing 80                          | 4.91  | 4.35.E-05 |
| 7763   | ZFAND5    | zinc finger AN1-type containing 5                         | -4.91 | 4.32.E-05 |
| 1528   | CYB5A     | cytochrome b5 type A                                      | -4.90 | 4.84.E-05 |
| 308    | ANXA5     | annexin A5                                                | 4.90  | 5.35.E-05 |
| 925    | CD8A      | CD8a molecule                                             | 4.90  | 5.32.E-05 |
| 314    | AOC2      | amine oxidase, copper containing 2                        | 4.90  | 5.29.E-05 |
| 3685   | ITGAV     | integrin subunit alpha V                                  | 4.89  | 5.26.E-05 |
| 940    | CD28      | CD28 molecule                                             | 4.89  | 5.24.E-05 |
| 157506 | RDH10     | retinol dehydrogenase 10 (all-trans)                      | -4.89 | 5.21.E-05 |
| 5973   | RENBP     | renin binding protein                                     | 4.89  | 5.18.E-05 |
| 10170  | DHRS9     | dehydrogenase/reductase 9                                 | 4.88  | 5.15.E-05 |
| 285362 | SUMF1     | sulfatase modifying factor 1                              | 4.86  | 6.15.E-05 |
| 158326 | FREM1     | FRAS1 related extracellular matrix 1                      | 4.86  | 6.12.E-05 |
| 3705   | ITPK1     | inositol-tetrakisphosphate 1-kinase                       | 4.86  | 6.09.E-05 |
| 9170   | LPAR2     | lysophosphatidic acid receptor 2                          | 4.86  | 6.06.E-05 |
| 283078 | MKX       | mohawk homeobox                                           | -4.86 | 6.03.E-05 |



|        |          |                                                                 |       |           |
|--------|----------|-----------------------------------------------------------------|-------|-----------|
| 5947   | RBP1     | retinol binding protein 1                                       | -4.85 | 6.00.E-05 |
| 126014 | OSCAR    | osteoclast associated, immunoglobulin-like receptor             | 4.85  | 6.47.E-05 |
| 58504  | ARHGAP22 | Rho GTPase activating protein 22                                | 4.85  | 6.93.E-05 |
| 56892  | C8orf4   | chromosome 8 open reading frame 4                               | -4.84 | 7.39.E-05 |
| 1062   | CENPE    | centromere protein E                                            | 4.83  | 7.35.E-05 |
| 4711   | NDUFB5   | NADH:ubiquinone oxidoreductase subunit B5                       | -4.83 | 7.80.E-05 |
| 2589   | GALNT1   | polypeptide N-acetylgalactosaminyltransferase 1                 | 4.83  | 7.77.E-05 |
| 83706  | FERMT3   | fermitin family member 3                                        | 4.83  | 7.73.E-05 |
| 5768   | QSOX1    | quiescin sulfhydryl oxidase 1                                   | 4.83  | 7.69.E-05 |
| 2802   | GOLGA3   | golgin A3                                                       | 4.83  | 7.66.E-05 |
| 57520  | HECW2    | HECT, C2 and WW domain containing E3 ubiquitin protein ligase 2 | -4.82 | 7.62.E-05 |
| 2769   | GNA15    | G protein subunit alpha 15                                      | 4.82  | 7.58.E-05 |
| 219855 | SLC37A2  | solute carrier family 37 member 2                               | 4.81  | 8.02.E-05 |
| 56937  | PMEPA1   | prostate transmembrane protein, androgen induced 1              | 4.81  | 7.98.E-05 |
| 1292   | COL6A2   | collagen type VI alpha 2 chain                                  | 4.81  | 7.94.E-05 |
| 388135 | C15orf59 | chromosome 15 open reading frame 59                             | 4.80  | 7.91.E-05 |
| 84706  | GPT2     | glutamic--pyruvic transaminase 2                                | -4.80 | 7.87.E-05 |
| 5027   | P2RX7    | purinergic receptor P2X 7                                       | 4.78  | 8.29.E-05 |
| 301    | ANXA1    | annexin A1                                                      | 4.78  | 8.26.E-05 |
| 64785  | GINS3    | GINS complex subunit 3                                          | -4.78 | 8.22.E-05 |
| 2876   | GPX1     | glutathione peroxidase 1                                        | 4.77  | 8.18.E-05 |
| 8800   | PEX11A   | peroxisomal biogenesis factor 11 alpha                          | -4.77 | 8.14.E-05 |
| 38     | ACAT1    | acetyl-CoA acetyltransferase 1                                  | -4.77 | 8.11.E-05 |
| 1728   | NQO1     | NAD(P)H quinone dehydrogenase 1                                 | 4.77  | 8.07.E-05 |
| 5920   | RARRES3  | retinoic acid receptor responder 3                              | 4.76  | 8.04.E-05 |
| 11332  | ACOT7    | acyl-CoA thioesterase 7                                         | 4.76  | 8.00.E-05 |
| 9781   | RNF144A  | ring finger protein 144A                                        | -4.75 | 8.85.E-05 |
| 55690  | PACS1    | phosphofurin acidic cluster sorting protein 1                   | 4.75  | 9.25.E-05 |
| 23175  | LPIN1    | lipin 1                                                         | -4.75 | 9.21.E-05 |
| 5164   | PDK2     | pyruvate dehydrogenase kinase 2                                 | -4.75 | 9.17.E-05 |
| 2213   | FCGR2B   | Fc fragment of IgG receptor IIb                                 | 4.74  | 9.13.E-05 |
| 9710   | KIAA0355 | KIAA0355                                                        | -4.74 | 9.09.E-05 |
| 10159  | ATP6AP2  | ATPase H+ transporting accessory protein 2                      | 4.74  | 9.05.E-05 |
| 1476   | CSTB     | cystatin B                                                      | 4.74  | 9.44.E-05 |
| 5660   | PSAP     | prosaposin                                                      | 4.74  | 9.40.E-05 |
| 6129   | RPL7     | ribosomal protein L7                                            | -4.74 | 1.02.E-04 |
| 1066   | CES1     | carboxylesterase 1                                              | 4.73  | 1.02.E-04 |
| 914    | CD2      | CD2 molecule                                                    | 4.73  | 1.01.E-04 |
| 80727  | TTYH3    | tweety family member 3                                          | 4.73  | 1.05.E-04 |
| 51299  | NRN1     | neuritin 1                                                      | -4.71 | 1.21.E-04 |
| 1102   | RCBTB2   | RCC1 and BTB domain containing protein 2                        | 4.70  | 1.21.E-04 |
| 8876   | VNN1     | vanin 1                                                         | 4.70  | 1.24.E-04 |
| 6709   | SPTAN1   | spectrin alpha, non-erythrocytic 1                              | 4.69  | 1.24.E-04 |
| 51227  | PIGP     | phosphatidylinositol glycan anchor biosynthesis class P         | -4.69 | 1.23.E-04 |
| 10144  | FAM13A   | family with sequence similarity 13 member A                     | -4.69 | 1.23.E-04 |
| 222553 | SLC35F1  | solute carrier family 35 member F1                              | -4.68 | 1.39.E-04 |
| 4131   | MAP1B    | microtubule associated protein 1B                               | 4.67  | 1.38.E-04 |
| 85457  | CIPC     | CLOCK interacting pacemaker                                     | -4.67 | 1.38.E-04 |
| 10184  | LHFPL2   | lipoma HMGIC fusion partner-like 2                              | 4.67  | 1.41.E-04 |
| 22850  | ADNP2    | ADNP homeobox 2                                                 | -4.67 | 1.45.E-04 |
| 713    | C1QB     | complement C1q B chain                                          | 4.67  | 1.48.E-04 |
| 55902  | ACSS2    | acyl-CoA synthetase short-chain family member 2                 | -4.66 | 1.47.E-04 |
| 128977 | C22orf39 | chromosome 22 open reading frame 39                             | -4.66 | 1.47.E-04 |
| 56833  | SLAMF8   | SLAM family member 8                                            | 4.66  | 1.46.E-04 |
| 51015  | ISOC1    | isochorismatase domain containing 1                             | -4.66 | 1.46.E-04 |
| 23654  | PLXNB2   | plexin B2                                                       | 4.66  | 1.45.E-04 |
| 282973 | JAKMIP3  | Janus kinase and microtubule interacting protein 3              | 4.66  | 1.45.E-04 |
| 4070   | TACSTD2  | tumor-associated calcium signal transducer 2                    | 4.66  | 1.44.E-04 |
| 339390 | CLEC4G   | C-type lectin domain family 4 member G                          | 4.66  | 1.43.E-04 |
| 4015   | LOX      | lysyl oxidase                                                   | 4.65  | 1.47.E-04 |
| 8767   | RIPK2    | receptor interacting serine/threonine kinase 2                  | 4.65  | 1.46.E-04 |
| 57121  | LPAR5    | lysophosphatidic acid receptor 5                                | 4.65  | 1.46.E-04 |
| 25878  | MXRA5    | matrix remodeling associated 5                                  | 4.65  | 1.45.E-04 |
| 124    | ADH1A    | alcohol dehydrogenase 1A (class I), alpha polypeptide           | -4.65 | 1.44.E-04 |
| 23417  | MLYCD    | malonyl-CoA decarboxylase                                       | -4.63 | 1.52.E-04 |
| 8614   | STC2     | stanniocalcin 2                                                 | 4.63  | 1.51.E-04 |
| 56922  | MCCC1    | methylcrotonoyl-CoA carboxylase 1                               | -4.63 | 1.50.E-04 |

|        |          |                                                                                      |       |           |
|--------|----------|--------------------------------------------------------------------------------------|-------|-----------|
| 202018 | TAPT1    | transmembrane anterior posterior transformation 1                                    | -4.62 | 1.54.E-04 |
| 4277   | MICB     | MHC class I polypeptide-related sequence B                                           | 4.62  | 1.57.E-04 |
| 64423  | INF2     | inverted formin, FH2 and WH2 domain containing                                       | 4.62  | 1.56.E-04 |
| 92162  | TMEM88   | transmembrane protein 88                                                             | -4.61 | 1.59.E-04 |
| 5099   | PCDH7    | protocadherin 7                                                                      | 4.61  | 1.59.E-04 |
| 29927  | SEC61A1  | Sec61 translocon alpha 1 subunit                                                     | 4.61  | 1.58.E-04 |
| 8455   | ATRN     | attractin                                                                            | 4.61  | 1.58.E-04 |
| 6403   | SELP     | selectin P                                                                           | 4.60  | 1.64.E-04 |
| 4318   | MMP9     | matrix metalloproteinase 9                                                           | 4.60  | 1.64.E-04 |
| 10402  | ST3GAL6  | ST3 beta-galactoside alpha-2,3-sialyltransferase 6                                   | -4.60 | 1.63.E-04 |
| 79095  | C9orf16  | chromosome 9 open reading frame 16                                                   | 4.60  | 1.62.E-04 |
| 3600   | IL15     | interleukin 15                                                                       | 4.60  | 1.62.E-04 |
| 2132   | EXT2     | exostosin glycosyltransferase 2                                                      | 4.59  | 1.68.E-04 |
| 5209   | PFKFB3   | 6-phosphofructo-2-kinase/fructose-2,6-bisphosphatase 3                               | -4.59 | 1.68.E-04 |
| 4035   | LRP1     | LDL receptor related protein 1                                                       | 4.58  | 1.67.E-04 |
| 864    | RUNX3    | runt related transcription factor 3                                                  | 4.58  | 1.67.E-04 |
| 6799   | SULT1A2  | sulfotransferase family 1A member 2                                                  | 4.58  | 1.66.E-04 |
| 58526  | MID1IP1  | MID1 interacting protein 1                                                           | -4.58 | 1.73.E-04 |
| 29763  | PACSIN3  | protein kinase C and casein kinase substrate in neurons 3                            | -4.57 | 1.72.E-04 |
| 80273  | GRPEL1   | GrpE like 1, mitochondrial                                                           | -4.57 | 1.71.E-04 |
| 257106 | ARHGAP30 | Rho GTPase activating protein 30                                                     | 4.56  | 1.74.E-04 |
| 2108   | ETFA     | electron transfer flavoprotein alpha subunit                                         | -4.56 | 1.77.E-04 |
| 1975   | EIF4B    | eukaryotic translation initiation factor 4B                                          | -4.55 | 1.83.E-04 |
| 83937  | RASSF4   | Ras association domain family member 4                                               | 4.54  | 1.83.E-04 |
| 8942   | KYNU     | kynureninase                                                                         | 4.54  | 1.82.E-04 |
| 28514  | DLL1     | delta like canonical Notch ligand 1                                                  | -4.54 | 1.82.E-04 |
| 3936   | LCP1     | lymphocyte cytosolic protein 1                                                       | 4.53  | 1.81.E-04 |
| 55638  | SYBU     | syntabulin                                                                           | -4.53 | 1.80.E-04 |
| 54     | ACP5     | acid phosphatase 5, tartrate resistant                                               | 4.53  | 1.80.E-04 |
| 11326  | VSIG4    | V-set and immunoglobulin domain containing 4                                         | 4.52  | 1.79.E-04 |
| 6609   | SMPD1    | sphingomyelin phosphodiesterase 1                                                    | 4.52  | 1.78.E-04 |
| 126321 | MFSD12   | major facilitator superfamily domain containing 12                                   | 4.52  | 1.78.E-04 |
| 9093   | DNAJA3   | DnaJ heat shock protein family (Hsp40) member A3                                     | -4.52 | 1.84.E-04 |
| 6184   | RPN1     | ribophorin I                                                                         | 4.52  | 1.87.E-04 |
| 9804   | TOMM20   | translocase of outer mitochondrial membrane 20                                       | -4.52 | 1.86.E-04 |
| 7342   | UBP1     | upstream binding protein 1 (LBP-1a)                                                  | 4.52  | 1.85.E-04 |
| 23307  | FKBP15   | FK506 binding protein 15                                                             | 4.51  | 1.85.E-04 |
| 56945  | MRPS22   | mitochondrial ribosomal protein S22                                                  | -4.51 | 1.84.E-04 |
| 714    | C1QC     | complement C1q C chain                                                               | 4.51  | 1.90.E-04 |
| 11075  | STMN2    | stathmin 2                                                                           | 4.51  | 1.90.E-04 |
| 54432  | YIPF1    | Yip1 domain family member 1                                                          | 4.50  | 1.89.E-04 |
| 12     | SERPINA3 | serpin family A member 3                                                             | 4.50  | 1.88.E-04 |
| 6509   | SLC1A4   | solute carrier family 1 member 4                                                     | 4.50  | 1.91.E-04 |
| 23460  | ABCA6    | ATP binding cassette subfamily A member 6                                            | 4.50  | 1.90.E-04 |
| 28992  | MACROD1  | MACRO domain containing 1                                                            | -4.50 | 1.90.E-04 |
| 5160   | PDHA1    | pyruvate dehydrogenase (lipoamide) alpha 1                                           | -4.49 | 1.92.E-04 |
| 84215  | ZNF541   | zinc finger protein 541                                                              | 4.48  | 1.95.E-04 |
| 2350   | FOLR2    | folate receptor beta                                                                 | 4.48  | 1.94.E-04 |
| 1650   | DDOST    | dolichyl-diphosphooligosaccharide--protein glycosyltransferase non-catalytic subunit | 4.48  | 1.97.E-04 |
| 11184  | MAP4K1   | mitogen-activated protein kinase kinase kinase kinase 1                              | 4.47  | 1.96.E-04 |
| 5179   | PENK     | proenkephalin                                                                        | 4.47  | 1.96.E-04 |
| 3646   | EIF3E    | eukaryotic translation initiation factor 3 subunit E                                 | -4.47 | 1.98.E-04 |
| 5330   | PLCB2    | phospholipase C beta 2                                                               | 4.46  | 2.10.E-04 |
| 85460  | ZNF518B  | zinc finger protein 518B                                                             | -4.46 | 2.09.E-04 |
| 5067   | CNTN3    | contactin 3                                                                          | 4.46  | 2.09.E-04 |
| 7436   | VLDLR    | very low density lipoprotein receptor                                                | 4.46  | 2.08.E-04 |
| 6146   | RPL22    | ribosomal protein L22                                                                | -4.46 | 2.07.E-04 |
| 51455  | REV1     | REV1, DNA directed polymerase                                                        | -4.46 | 2.07.E-04 |
| 3140   | MR1      | major histocompatibility complex, class I-related                                    | 4.46  | 2.06.E-04 |
| 28984  | RGCC     | regulator of cell cycle                                                              | -4.45 | 2.12.E-04 |
| 55203  | LGI2     | leucine rich repeat LGI family member 2                                              | 4.44  | 2.14.E-04 |
| 1410   | CRYAB    | crystallin alpha B                                                                   | 4.44  | 2.13.E-04 |
| 84263  | HSDL2    | hydroxysteroid dehydrogenase like 2                                                  | -4.44 | 2.13.E-04 |
| 2331   | FMOD     | fibromodulin                                                                         | 4.43  | 2.12.E-04 |
| 6357   | CCL13    | C-C motif chemokine ligand 13                                                        | 4.42  | 2.24.E-04 |
| 9961   | MVP      | major vault protein                                                                  | 4.42  | 2.23.E-04 |
| 5025   | P2RX4    | purinergic receptor P2X 4                                                            | 4.41  | 2.22.E-04 |

|        |          |                                                            |       |           |
|--------|----------|------------------------------------------------------------|-------|-----------|
| 1874   | E2F4     | E2F transcription factor 4                                 | -4.41 | 2.22.E-04 |
| 55758  | RCOR3    | REST corepressor 3                                         | -4.41 | 2.24.E-04 |
| 201266 | SLC39A11 | solute carrier family 39 member 11                         | 4.41  | 2.26.E-04 |
| 54996  | MARC2    | mitochondrial amidoxime reducing component 2               | -4.41 | 2.26.E-04 |
| 4481   | MSR1     | macrophage scavenger receptor 1                            | 4.41  | 2.25.E-04 |
| 79746  | ECHDC3   | enoyl-CoA hydratase domain containing 3                    | -4.41 | 2.24.E-04 |
| 2533   | FYB      | FYN binding protein                                        | 4.40  | 2.24.E-04 |
| 27040  | LAT      | linker for activation of T-cells                           | 4.40  | 2.26.E-04 |
| 6850   | SYK      | spleen associated tyrosine kinase                          | 4.40  | 2.25.E-04 |
| 6100   | RP9      | retinitis pigmentosa 9 (autosomal dominant)                | -4.40 | 2.24.E-04 |
| 3656   | IRAK2    | interleukin 1 receptor associated kinase 2                 | -4.39 | 2.27.E-04 |
| 55168  | MRPS18A  | mitochondrial ribosomal protein S18A                       | -4.39 | 2.26.E-04 |
| 55526  | DHTKD1   | dehydrogenase E1 and transketolase domain containing 1     | -4.39 | 2.25.E-04 |
| 23213  | SULF1    | sulfatase 1                                                | -4.39 | 2.25.E-04 |
| 256236 | NAPSB    | napsin B aspartic peptidase, pseudogene                    | 4.38  | 2.30.E-04 |
| 64092  | SAMSN1   | SAM domain, SH3 domain and nuclear localization signals 1  | 4.38  | 2.29.E-04 |
| 3290   | HSD11B1  | hydroxysteroid 11-beta dehydrogenase 1                     | 4.38  | 2.29.E-04 |
| 5360   | PLTP     | phospholipid transfer protein                              | 4.38  | 2.31.E-04 |
| 3988   | LIPA     | lipase A, lysosomal acid type                              | 4.37  | 2.36.E-04 |
| 59343  | SEN2     | SUMO1/sentrin/SMT3 specific peptidase 2                    | -4.37 | 2.35.E-04 |
| 1436   | CSF1R    | colony stimulating factor 1 receptor                       | 4.36  | 2.43.E-04 |
| 4642   | MYO1D    | myosin ID                                                  | 4.36  | 2.45.E-04 |
| 991    | CDC20    | cell division cycle 20                                     | 4.36  | 2.44.E-04 |
| 140885 | SIRPA    | signal regulatory protein alpha                            | 4.36  | 2.44.E-04 |
| 23353  | SUN1     | Sad1 and UNC84 domain containing 1                         | -4.36 | 2.46.E-04 |
| 2194   | FASN     | fatty acid synthase                                        | -4.36 | 2.45.E-04 |
| 25807  | RHBDD3   | rhomboid domain containing 3                               | 4.36  | 2.50.E-04 |
| 84364  | ARFGAP2  | ADP ribosylation factor GTPase activating protein 2        | -4.35 | 2.49.E-04 |
| 302    | ANXA2    | annexin A2                                                 | 4.35  | 2.49.E-04 |
| 1471   | CST3     | cystatin C                                                 | 4.35  | 2.48.E-04 |
| 902    | CCNH     | cyclin H                                                   | -4.35 | 2.47.E-04 |
| 811    | CALR     | calreticulin                                               | 4.35  | 2.52.E-04 |
| 54496  | PRMT7    | protein arginine methyltransferase 7                       | -4.34 | 2.60.E-04 |
| 8565   | YARS     | tyrosyl-tRNA synthetase                                    | 4.34  | 2.59.E-04 |
| 241    | ALOX5AP  | arachidonate 5-lipoxygenase activating protein             | 4.34  | 2.66.E-04 |
| 130733 | TMEM178A | transmembrane protein 178A                                 | 4.33  | 2.66.E-04 |
| 79017  | GGCT     | gamma-glutamylcyclotransferase                             | -4.33 | 2.70.E-04 |
| 3557   | IL1RN    | interleukin 1 receptor antagonist                          | 4.33  | 2.75.E-04 |
| 3654   | IRAK1    | interleukin 1 receptor associated kinase 1                 | 4.33  | 2.77.E-04 |
| 56243  | KIAA1217 | KIAA1217                                                   | -4.33 | 2.76.E-04 |
| 6363   | CCL19    | C-C motif chemokine ligand 19                              | 4.33  | 2.75.E-04 |
| 9114   | ATP6V0D1 | ATPase H+ transporting V0 subunit d1                       | 4.32  | 2.77.E-04 |
| 201895 | SMIM14   | small integral membrane protein 14                         | 4.32  | 2.77.E-04 |
| 7454   | WAS      | Wiskott-Aldrich syndrome                                   | 4.32  | 2.79.E-04 |
| 54331  | GNG2     | G protein subunit gamma 2                                  | 4.31  | 2.96.E-04 |
| 137872 | ADHFE1   | alcohol dehydrogenase, iron containing 1                   | -4.30 | 2.98.E-04 |
| 2717   | GLA      | galactosidase alpha                                        | 4.30  | 3.11.E-04 |
| 9677   | PP15K1   | diphosphoinositol pentakisphosphate kinase 1               | 4.30  | 3.10.E-04 |
| 5095   | PCCA     | propionyl-CoA carboxylase alpha subunit                    | -4.30 | 3.09.E-04 |
| 7462   | LAT2     | linker for activation of T-cells family member 2           | 4.29  | 3.11.E-04 |
| 51134  | CEP83    | centrosomal protein 83                                     | 4.29  | 3.13.E-04 |
| 57333  | RCN3     | reticulocalbin 3                                           | 4.29  | 3.12.E-04 |
| 157    | GRK3     | G protein-coupled receptor kinase 3                        | -4.29 | 3.11.E-04 |
| 55228  | PNMAL1   | paraneoplastic Ma antigen family like 1                    | 4.28  | 3.10.E-04 |
| 84268  | RPAIN    | RPA interacting protein                                    | -4.28 | 3.12.E-04 |
| 11309  | SLCO2B1  | solute carrier organic anion transporter family member 2B1 | 4.28  | 3.19.E-04 |
| 10263  | CDK2AP2  | cyclin dependent kinase 2 associated protein 2             | 4.28  | 3.23.E-04 |
| 11261  | CHP1     | calcineurin like EF-hand protein 1                         | -4.28 | 3.25.E-04 |
| 389136 | VGLL3    | vestigial like family member 3                             | 4.27  | 3.24.E-04 |
| 55900  | ZNF302   | zinc finger protein 302                                    | -4.27 | 3.26.E-04 |
| 9938   | ARHGAP25 | Rho GTPase activating protein 25                           | 4.27  | 3.25.E-04 |
| 7107   | GPR137B  | G protein-coupled receptor 137B                            | 4.27  | 3.29.E-04 |
| 2631   | GBAS     | glioblastoma amplified sequence                            | -4.27 | 3.28.E-04 |
| 125    | ADH1B    | alcohol dehydrogenase 1B (class I), beta polypeptide       | -4.26 | 3.27.E-04 |
| 51110  | LACTB2   | lactamase beta 2                                           | -4.26 | 3.27.E-04 |
| 10140  | TOB1     | transducer of ERBB2, 1                                     | -4.26 | 3.26.E-04 |
| 132671 | SPATA18  | spermatogenesis associated 18                              | 4.26  | 3.28.E-04 |

|        |          |                                                                   |       |           |
|--------|----------|-------------------------------------------------------------------|-------|-----------|
| 55589  | BMP2K    | BMP2 inducible kinase                                             | 4.26  | 3.27.E-04 |
| 8613   | PLPP3    | phospholipid phosphatase 3                                        | -4.26 | 3.26.E-04 |
| 4953   | ODC1     | ornithine decarboxylase 1                                         | 4.26  | 3.33.E-04 |
| 245802 | MS4A6E   | membrane spanning 4-domains A6E                                   | 4.25  | 3.34.E-04 |
| 90853  | SPOCD1   | SPOC domain containing 1                                          | 4.25  | 3.33.E-04 |
| 124565 | SLC38A10 | solute carrier family 38 member 10                                | 4.25  | 3.40.E-04 |
| 26227  | PHGDH    | phosphoglycerate dehydrogenase                                    | -4.25 | 3.39.E-04 |
| 64231  | MS4A6A   | membrane spanning 4-domains A6A                                   | 4.24  | 3.41.E-04 |
| 6035   | RNASE1   | ribonuclease A family member 1, pancreatic                        | 4.24  | 3.40.E-04 |
| 84987  | COX14    | COX14, cytochrome c oxidase assembly factor                       | -4.24 | 3.39.E-04 |
| 54504  | CPVL     | carboxypeptidase, vitellogenic like                               | 4.24  | 3.41.E-04 |
| 205    | AK4      | adenylate kinase 4                                                | -4.24 | 3.47.E-04 |
| 1031   | CDKN2C   | cyclin dependent kinase inhibitor 2C                              | -4.23 | 3.66.E-04 |
| 9332   | CD163    | CD163 molecule                                                    | 4.23  | 3.65.E-04 |
| 96764  | TGS1     | trimethylguanosine synthase 1                                     | -4.23 | 3.64.E-04 |
| 51263  | MRPL30   | mitochondrial ribosomal protein L30                               | -4.23 | 3.70.E-04 |
| 81037  | CLPTM1L  | CLPTM1 like                                                       | 4.22  | 3.74.E-04 |
| 84134  | TOMM40L  | translocase of outer mitochondrial membrane 40 like               | 4.22  | 3.80.E-04 |
| 10400  | PEMT     | phosphatidylethanolamine N-methyltransferase                      | 4.22  | 3.79.E-04 |
| 10261  | IGSF6    | immunoglobulin superfamily member 6                               | 4.22  | 3.79.E-04 |
| 10318  | TNIP1    | TNFAIP3 interacting protein 1                                     | 4.22  | 3.85.E-04 |
| 55023  | PHIP     | pleckstrin homology domain interacting protein                    | -4.22 | 3.89.E-04 |
| 3074   | HEXB     | hexosaminidase subunit beta                                       | 4.21  | 4.00.E-04 |
| 3131   | HLF      | HLF, PAR bZIP transcription factor                                | -4.21 | 3.99.E-04 |
| 29944  | PNMA3    | paraneoplastic Ma antigen 3                                       | -4.21 | 4.07.E-04 |
| 929    | CD14     | CD14 molecule                                                     | 4.20  | 4.06.E-04 |
| 55803  | ADAP2    | ArfGAP with dual PH domains 2                                     | 4.20  | 4.05.E-04 |
| 664    | BNIP3    | BCL2 interacting protein 3                                        | -4.20 | 4.04.E-04 |
| 378    | ARF4     | ADP ribosylation factor 4                                         | 4.20  | 4.08.E-04 |
| 4701   | NDUFA7   | NADH:ubiquinone oxidoreductase subunit A7                         | -4.20 | 4.09.E-04 |
| 712    | C1QA     | complement C1q A chain                                            | 4.20  | 4.11.E-04 |
| 55200  | PLEKHG6  | pleckstrin homology and RhoGEF domain containing G6               | -4.20 | 4.10.E-04 |
| 80206  | FHOD3    | formin homology 2 domain containing 3                             | -4.19 | 4.11.E-04 |
| 2764   | GMFB     | glia maturation factor beta                                       | 4.19  | 4.10.E-04 |
| 3512   | JCHAIN   | joining chain of multimeric IgA and IgM                           | 4.19  | 4.09.E-04 |
| 53833  | IL20RB   | interleukin 20 receptor subunit beta                              | 4.19  | 4.13.E-04 |
| 219736 | STOX1    | storkhead box 1                                                   | -4.19 | 4.12.E-04 |
| 64983  | MRPL32   | mitochondrial ribosomal protein L32                               | -4.19 | 4.11.E-04 |
| 6195   | RPS6KA1  | ribosomal protein S6 kinase A1                                    | 4.19  | 4.10.E-04 |
| 2517   | FUCA1    | fucosidase, alpha-L- 1, tissue                                    | 4.19  | 4.09.E-04 |
| 5269   | SERPINB6 | serpin family B member 6                                          | -4.19 | 4.08.E-04 |
| 3101   | HK3      | hexokinase 3                                                      | 4.18  | 4.10.E-04 |
| 55374  | TMCO6    | transmembrane and coiled-coil domains 6                           | -4.18 | 4.09.E-04 |
| 6856   | SYPL1    | synaptophysin like 1                                              | -4.18 | 4.17.E-04 |
| 822    | CAPG     | capping actin protein, gelsolin like                              | 4.18  | 4.16.E-04 |
| 2936   | GSR      | glutathione-disulfide reductase                                   | 4.18  | 4.15.E-04 |
| 23404  | EXOSC2   | exosome component 2                                               | -4.18 | 4.14.E-04 |
| 2532   | ACKR1    | atypical chemokine receptor 1 (Duffy blood group)                 | 4.17  | 4.13.E-04 |
| 4233   | MET      | MET proto-oncogene, receptor tyrosine kinase                      | -4.17 | 4.14.E-04 |
| 50484  | RRM2B    | ribonucleotide reductase regulatory TP53 inducible subunit M2B    | 4.17  | 4.16.E-04 |
| 942    | CD86     | CD86 molecule                                                     | 4.17  | 4.28.E-04 |
| 6050   | RNH1     | ribonuclease/angiogenin inhibitor 1                               | 4.16  | 4.29.E-04 |
| 10243  | GPHN     | gephyrin                                                          | -4.16 | 4.30.E-04 |
| 80896  | NPL      | N-acetylneuraminase pyruvate lyase                                | 4.16  | 4.30.E-04 |
| 7018   | TF       | transferrin                                                       | -4.16 | 4.31.E-04 |
| 4301   | AFDN     | afadin, adherens junction formation factor                        | -4.16 | 4.32.E-04 |
| 10072  | DPP3     | dipeptidyl peptidase 3                                            | 4.16  | 4.31.E-04 |
| 58477  | SRPRB    | SRP receptor beta subunit                                         | 4.16  | 4.30.E-04 |
| 3109   | HLA-DMB  | major histocompatibility complex, class II, DM beta               | 4.16  | 4.29.E-04 |
| 196527 | ANO6     | anoctamin 6                                                       | -4.15 | 4.39.E-04 |
| 50619  | DEF6     | DEF6, guanine nucleotide exchange factor                          | 4.15  | 4.43.E-04 |
| 10020  | GNE      | glucosamine (UDP-N-acetyl)-2-epimerase/N-acetylmannosamine kinase | -4.14 | 4.46.E-04 |
| 719    | C3AR1    | complement C3a receptor 1                                         | 4.14  | 4.45.E-04 |
| 8877   | SPHK1    | sphingosine kinase 1                                              | 4.14  | 4.46.E-04 |
| 8459   | TPST2    | tyrosylprotein sulfotransferase 2                                 | 4.14  | 4.47.E-04 |
| 29127  | RACGAP1  | Rac GTPase activating protein 1                                   | 4.14  | 4.51.E-04 |
| 4999   | ORC2     | origin recognition complex subunit 2                              | -4.13 | 4.50.E-04 |

|        |           |                                                                |       |           |
|--------|-----------|----------------------------------------------------------------|-------|-----------|
| 51588  | PIAS4     | protein inhibitor of activated STAT 4                          | -4.13 | 4.57.E-04 |
| 57185  | NIPAL3    | NIPA like domain containing 3                                  | -4.13 | 4.56.E-04 |
| 56920  | SEMA3G    | semaphorin 3G                                                  | 4.12  | 4.62.E-04 |
| 10525  | HYOU1     | hypoxia up-regulated 1                                         | 4.12  | 4.61.E-04 |
| 3625   | INHBB     | inhibin beta B subunit                                         | 4.12  | 4.60.E-04 |
| 9056   | SLC7A7    | solute carrier family 7 member 7                               | 4.12  | 4.61.E-04 |
| 58191  | CXCL16    | C-X-C motif chemokine ligand 16                                | 4.12  | 4.60.E-04 |
| 6832   | SUPV3L1   | Suv3 like RNA helicase                                         | -4.12 | 4.59.E-04 |
| 1291   | COL6A1    | collagen type VI alpha 1 chain                                 | 4.12  | 4.60.E-04 |
| 3001   | GZMA      | granzyme A                                                     | 4.11  | 4.63.E-04 |
| 138716 | RPP25L    | ribonuclease P/MRP subunit p25 like                            | -4.11 | 4.64.E-04 |
| 55022  | PID1      | phosphotyrosine interaction domain containing 1                | 4.11  | 4.68.E-04 |
| 2101   | ESRRA     | estrogen related receptor alpha                                | -4.11 | 4.67.E-04 |
| 84622  | ZNF594    | zinc finger protein 594                                        | -4.11 | 4.72.E-04 |
| 143458 | LDLRAD3   | low density lipoprotein receptor class A domain containing 3   | -4.10 | 4.83.E-04 |
| 214    | ALCAM     | activated leukocyte cell adhesion molecule                     | 4.10  | 4.82.E-04 |
| 64098  | PARVG     | parvin gamma                                                   | 4.10  | 4.90.E-04 |
| 7133   | TNFRSF1B  | TNF receptor superfamily member 1B                             | 4.10  | 4.93.E-04 |
| 118980 | SFXN2     | sideroflexin 2                                                 | -4.09 | 4.98.E-04 |
| 1535   | CYBA      | cytochrome b-245 alpha chain                                   | 4.09  | 4.97.E-04 |
| 10840  | ALDH1L1   | aldehyde dehydrogenase 1 family member L1                      | -4.09 | 4.96.E-04 |
| 8727   | CTNNA1    | catenin alpha like 1                                           | -4.09 | 4.99.E-04 |
| 6355   | CCL8      | C-C motif chemokine ligand 8                                   | 4.08  | 5.06.E-04 |
| 158800 | RHOXF1    | Rhox homeobox family member 1                                  | 4.08  | 5.09.E-04 |
| 51057  | WDPCP     | WD repeat containing planar cell polarity effector             | 4.08  | 5.14.E-04 |
| 56952  | PRTFDC1   | phosphoribosyl transferase domain containing 1                 | 4.08  | 5.15.E-04 |
| 58528  | RRAGD     | Ras related GTP binding D                                      | -4.08 | 5.14.E-04 |
| 114876 | OSBPL1A   | oxysterol binding protein like 1A                              | -4.08 | 5.15.E-04 |
| 2822   | GPLD1     | glycosylphosphatidylinositol specific phospholipase D1         | 4.08  | 5.14.E-04 |
| 23179  | RGL1      | ral guanine nucleotide dissociation stimulator like 1          | 4.08  | 5.13.E-04 |
| 51296  | SLC15A3   | solute carrier family 15 member 3                              | 4.07  | 5.16.E-04 |
| 9811   | CTIF      | cap binding complex dependent translation initiation factor    | 4.07  | 5.19.E-04 |
| 58986  | TMEM8A    | transmembrane protein 8A                                       | 4.07  | 5.20.E-04 |
| 5274   | SERPINI1  | serpin family I member 1                                       | -4.07 | 5.23.E-04 |
| 55013  | MCUB      | mitochondrial calcium uniporter dominant negative beta subunit | 4.07  | 5.22.E-04 |
| 54850  | FBXL12    | F-box and leucine rich repeat protein 12                       | -4.07 | 5.23.E-04 |
| 8857   | FCGBP     | Fc fragment of IgG binding protein                             | 4.07  | 5.28.E-04 |
| 665    | BNIP3L    | BCL2 interacting protein 3 like                                | -4.07 | 5.29.E-04 |
| 1020   | CDK5      | cyclin dependent kinase 5                                      | 4.06  | 5.28.E-04 |
| 960    | CD44      | CD44 molecule (Indian blood group)                             | 4.06  | 5.31.E-04 |
| 3162   | HMOX1     | heme oxygenase 1                                               | 4.06  | 5.33.E-04 |
| 79944  | L2HGDH    | L-2-hydroxyglutarate dehydrogenase                             | -4.06 | 5.38.E-04 |
| 4316   | MMP7      | matrix metalloproteinase 7                                     | 4.06  | 5.37.E-04 |
| 57502  | NLGN4X    | neuroligin 4, X-linked                                         | -4.05 | 5.54.E-04 |
| 10961  | ERP29     | endoplasmic reticulum protein 29                               | 4.05  | 5.53.E-04 |
| 2222   | FDFT1     | farnesyl-diphosphate farnesyltransferase 1                     | -4.05 | 5.58.E-04 |
| 55799  | CACNA2D3  | calcium voltage-gated channel auxiliary subunit alpha2delta 3  | 4.05  | 5.72.E-04 |
| 30817  | ADGRE2    | adhesion G protein-coupled receptor E2                         | 4.04  | 5.77.E-04 |
| 5341   | PLEK      | pleckstrin                                                     | 4.04  | 5.76.E-04 |
| 1632   | ECI1      | enoyl-CoA delta isomerase 1                                    | -4.04 | 5.76.E-04 |
| 5781   | PTPN11    | protein tyrosine phosphatase, non-receptor type 11             | 4.04  | 5.89.E-04 |
| 10287  | RGS19     | regulator of G-protein signaling 19                            | 4.04  | 5.95.E-04 |
| 283316 | CD163L1   | CD163 molecule like 1                                          | 4.04  | 5.94.E-04 |
| 143503 | OR51E1    | olfactory receptor family 51 subfamily E member 1              | -4.03 | 6.01.E-04 |
| 4134   | MAP4      | microtubule associated protein 4                               | 4.03  | 6.00.E-04 |
| 55335  | NIPSNAP3B | nipsnap homolog 3B                                             | -4.03 | 5.98.E-04 |
| 55876  | GSDMB     | gasdermin B                                                    | -4.03 | 6.05.E-04 |
| 9397   | NMT2      | N-myristoyltransferase 2                                       | 4.03  | 6.15.E-04 |
| 54675  | CRLS1     | cardiolipin synthase 1                                         | -4.03 | 6.14.E-04 |
| 10234  | LRRC17    | leucine rich repeat containing 17                              | -4.02 | 6.22.E-04 |
| 57863  | CADM3     | cell adhesion molecule 3                                       | 4.02  | 6.23.E-04 |
| 10491  | CRTAP     | cartilage associated protein                                   | 4.02  | 6.29.E-04 |
| 54510  | PCDH18    | protocadherin 18                                               | -4.01 | 6.49.E-04 |
| 7461   | CLIP2     | CAP-Gly domain containing linker protein 2                     | 4.01  | 6.61.E-04 |
| 9728   | SECISBP2L | SECIS binding protein 2 like                                   | -4.01 | 6.60.E-04 |
| 4258   | MGST2     | microsomal glutathione S-transferase 2                         | -4.01 | 6.66.E-04 |
| 7337   | UBE3A     | ubiquitin protein ligase E3A                                   | -4.01 | 6.67.E-04 |

|        |          |                                                                    |       |           |
|--------|----------|--------------------------------------------------------------------|-------|-----------|
| 79651  | RHBDF2   | rhomboid 5 homolog 2                                               | 4.01  | 6.69.E-04 |
| 1666   | DECR1    | 2,4-dienoyl-CoA reductase 1, mitochondrial                         | -4.00 | 6.74.E-04 |
| 9377   | COX5A    | cytochrome c oxidase subunit 5A                                    | -4.00 | 6.91.E-04 |
| 2734   | GLG1     | golgi glycoprotein 1                                               | 3.99  | 7.01.E-04 |
| 875    | CBS      | cystathionine-beta-synthase                                        | -3.99 | 6.99.E-04 |
| 84966  | IGSF21   | immunoglobulin superfamily member 21                               | 3.99  | 7.09.E-04 |
| 53340  | SPA17    | sperm autoantigenic protein 17                                     | 3.99  | 7.08.E-04 |
| 2534   | FYN      | FYN proto-oncogene, Src family tyrosine kinase                     | 3.99  | 7.07.E-04 |
| 121506 | ERP27    | endoplasmic reticulum protein 27                                   | 3.99  | 7.05.E-04 |
| 57522  | SRGAP1   | SLIT-ROBO Rho GTPase activating protein 1                          | 3.99  | 7.10.E-04 |
| 64859  | NABP1    | nucleic acid binding protein 1                                     | 3.99  | 7.10.E-04 |
| 29887  | SNX10    | sorting nexin 10                                                   | 3.99  | 7.09.E-04 |
| 3683   | ITGAL    | integrin subunit alpha L                                           | 3.98  | 7.17.E-04 |
| 4126   | MANBA    | mannosidase beta                                                   | 3.98  | 7.23.E-04 |
| 1508   | CTSB     | cathepsin B                                                        | 3.98  | 7.23.E-04 |
| 7386   | UQCRCF51 | ubiquinol-cytochrome c reductase, Rieske iron-sulfur polypeptide 1 | -3.98 | 7.22.E-04 |
| 2207   | FCER1G   | Fc fragment of IgE receptor Ig                                     | 3.98  | 7.24.E-04 |
| 79699  | ZYG11B   | zyg-11 family member B, cell cycle regulator                       | -3.97 | 7.25.E-04 |
| 27286  | SRPX2    | sushi repeat containing protein, X-linked 2                        | 3.97  | 7.23.E-04 |
| 10950  | BTG3     | BTG anti-proliferation factor 3                                    | -3.97 | 7.26.E-04 |
| 22839  | DLGAP4   | DLG associated protein 4                                           | 3.97  | 7.30.E-04 |
| 8667   | EIF3H    | eukaryotic translation initiation factor 3 subunit H               | -3.97 | 7.36.E-04 |
| 57103  | TIGAR    | TP53 induced glycolysis regulatory phosphatase                     | 3.97  | 7.47.E-04 |
| 5777   | PTPN6    | protein tyrosine phosphatase, non-receptor type 6                  | 3.96  | 7.53.E-04 |
| 6696   | SPP1     | secreted phosphoprotein 1                                          | 3.96  | 7.53.E-04 |
| 125113 | KRT222   | keratin 222                                                        | -3.96 | 7.59.E-04 |
| 8671   | SLC4A4   | solute carrier family 4 member 4                                   | -3.96 | 7.58.E-04 |
| 283431 | GAS2L3   | growth arrest specific 2 like 3                                    | 3.95  | 7.56.E-04 |
| 374403 | TBC1D10C | TBC1 domain family member 10C                                      | 3.95  | 7.62.E-04 |
| 84171  | LOXL4    | lysyl oxidase like 4                                               | 3.95  | 7.61.E-04 |
| 6788   | STK3     | serine/threonine kinase 3                                          | -3.95 | 7.66.E-04 |
| 10227  | MFSD10   | major facilitator superfamily domain containing 10                 | 3.95  | 7.65.E-04 |
| 9903   | KLHL21   | kelch like family member 21                                        | -3.95 | 7.65.E-04 |
| 10460  | TACC3    | transforming acidic coiled-coil containing protein 3               | 3.95  | 7.78.E-04 |
| 430    | ASCL2    | achaete-scute family bHLH transcription factor 2                   | 3.95  | 7.79.E-04 |
| 25849  | PARM1    | prostate androgen-regulated mucin-like protein 1                   | -3.95 | 7.77.E-04 |
| 9046   | DOK2     | docking protein 2                                                  | 3.95  | 7.76.E-04 |
| 2768   | GNA12    | G protein subunit alpha 12                                         | 3.94  | 7.83.E-04 |
| 5699   | PSMB10   | proteasome subunit beta 10                                         | 3.94  | 7.82.E-04 |
| 5791   | PTPRE    | protein tyrosine phosphatase, receptor type E                      | 3.94  | 7.80.E-04 |
| 2896   | GRN      | granulin                                                           | 3.94  | 7.95.E-04 |
| 113    | ADCY7    | adenylate cyclase 7                                                | 3.94  | 8.00.E-04 |
| 115827 | RAB3C    | RAB3C, member RAS oncogene family                                  | 3.94  | 7.99.E-04 |
| 26061  | HACL1    | 2-hydroxyacyl-CoA lyase 1                                          | 3.93  | 8.01.E-04 |
| 126    | ADH1C    | alcohol dehydrogenase 1C (class I), gamma polypeptide              | -3.93 | 8.00.E-04 |
| 3357   | HTR2B    | 5-hydroxytryptamine receptor 2B                                    | 3.92  | 8.24.E-04 |
| 80312  | TET1     | tet methylcytosine dioxygenase 1                                   | -3.92 | 8.30.E-04 |
| 2099   | ESR1     | estrogen receptor 1                                                | -3.92 | 8.28.E-04 |
| 115098 | CCDC124  | coiled-coil domain containing 124                                  | 3.92  | 8.34.E-04 |
| 55260  | TMEM143  | transmembrane protein 143                                          | -3.92 | 8.36.E-04 |
| 23031  | MAST3    | microtubule associated serine/threonine kinase 3                   | 3.92  | 8.34.E-04 |
| 8382   | NME5     | NME/NM23 family member 5                                           | 3.91  | 8.52.E-04 |
| 133383 | SETD9    | SET domain containing 9                                            | -3.91 | 8.55.E-04 |
| 8673   | VAMP8    | vesicle associated membrane protein 8                              | 3.91  | 8.61.E-04 |
| 57706  | DENND1A  | DENN domain containing 1A                                          | 3.91  | 8.66.E-04 |
| 115123 | MARCH3   | membrane associated ring-CH-type finger 3                          | -3.91 | 8.66.E-04 |
| 8050   | PDHX     | pyruvate dehydrogenase complex component X                         | -3.91 | 8.66.E-04 |
| 123920 | CMTM3    | CKLF like MARVEL transmembrane domain containing 3                 | 3.91  | 8.65.E-04 |
| 80018  | NAA25    | N(alpha)-acetyltransferase 25, NatB auxiliary subunit              | -3.90 | 8.75.E-04 |
| 31     | ACACA    | acetyl-CoA carboxylase alpha                                       | -3.90 | 8.77.E-04 |
| 7305   | TYROBP   | TYRO protein tyrosine kinase binding protein                       | 3.90  | 8.79.E-04 |
| 79752  | ZFAND1   | zinc finger AN1-type containing 1                                  | -3.90 | 8.79.E-04 |
| 55357  | TBC1D2   | TBC1 domain family member 2                                        | 3.90  | 8.79.E-04 |
| 729359 | PLIN4    | perilipin 4                                                        | 3.90  | 8.78.E-04 |
| 32     | ACACB    | acetyl-CoA carboxylase beta                                        | -3.89 | 8.93.E-04 |
| 64174  | DPEP2    | dipeptidase 2                                                      | 3.89  | 8.98.E-04 |
| 3071   | NCKAP1L  | NCK associated protein 1 like                                      | 3.89  | 9.02.E-04 |

|        |           |                                                         |       |           |
|--------|-----------|---------------------------------------------------------|-------|-----------|
| 79873  | NUDT18    | nudix hydrolase 18                                      | 3.89  | 9.15.E-04 |
| 220002 | CYB561A3  | cytochrome b561 family member A3                        | 3.89  | 9.14.E-04 |
| 27173  | SLC39A1   | solute carrier family 39 member 1                       | 3.89  | 9.24.E-04 |
| 23523  | CABIN1    | calcineurin binding protein 1                           | 3.88  | 9.31.E-04 |
| 64747  | MFSD1     | major facilitator superfamily domain containing 1       | 3.88  | 9.34.E-04 |
| 9697   | TRAM2     | translocation associated membrane protein 2             | 3.88  | 9.34.E-04 |
| 79085  | SLC25A23  | solute carrier family 25 member 23                      | -3.88 | 9.33.E-04 |
| 1104   | RCC1      | regulator of chromosome condensation 1                  | 3.88  | 9.38.E-04 |
| 4891   | SLC11A2   | solute carrier family 11 member 2                       | 3.88  | 9.41.E-04 |
| 5329   | PLAUR     | plasminogen activator, urokinase receptor               | 3.88  | 9.44.E-04 |
| 4644   | MYO5A     | myosin VA                                               | 3.88  | 9.43.E-04 |
| 80704  | SLC19A3   | solute carrier family 19 member 3                       | -3.87 | 9.59.E-04 |
| 60     | ACTB      | actin beta                                              | 3.87  | 9.61.E-04 |
| 2956   | MSH6      | mutS homolog 6                                          | -3.87 | 9.74.E-04 |
| 5654   | HTRA1     | HtrA serine peptidase 1                                 | 3.87  | 9.81.E-04 |
| 8476   | CDC42BPA  | CDC42 binding protein kinase alpha                      | -3.87 | 9.84.E-04 |
| 23166  | STAB1     | stabilin 1                                              | 3.86  | 9.94.E-04 |
| 51099  | ABHD5     | abhydrolase domain containing 5                         | -3.86 | 9.98.E-04 |
| 409    | ARRB2     | arrestin beta 2                                         | 3.86  | 1.01.E-03 |
| 51199  | NIN       | ninein                                                  | 3.86  | 1.02.E-03 |
| 2123   | EVI2A     | ecotropic viral integration site 2A                     | 3.85  | 1.03.E-03 |
| 3059   | HCLS1     | hematopoietic cell-specific Lyn substrate 1             | 3.85  | 1.03.E-03 |
| 287    | ANK2      | ankyrin 2                                               | -3.85 | 1.04.E-03 |
| 54927  | CHCHD3    | coiled-coil-helix-coiled-coil-helix domain containing 3 | -3.85 | 1.04.E-03 |
| 6789   | STK4      | serine/threonine kinase 4                               | 3.85  | 1.04.E-03 |
| 6730   | SRP68     | signal recognition particle 68                          | -3.85 | 1.04.E-03 |
| 221303 | FAM162B   | family with sequence similarity 162 member B            | -3.85 | 1.04.E-03 |
| 10981  | RAB32     | RAB32, member RAS oncogene family                       | 3.85  | 1.05.E-03 |
| 55852  | TEX2      | testis expressed 2                                      | 3.84  | 1.06.E-03 |
| 29071  | C1GALT1C1 | C1GALT1 specific chaperone 1                            | 3.84  | 1.06.E-03 |
| 84803  | GPAT3     | glycerol-3-phosphate acyltransferase 3                  | -3.84 | 1.06.E-03 |
| 5465   | PPARA     | peroxisome proliferator activated receptor alpha        | -3.84 | 1.07.E-03 |
| 128346 | C1orf162  | chromosome 1 open reading frame 162                     | 3.84  | 1.07.E-03 |
| 9276   | COPB2     | coatamer protein complex subunit beta 2                 | 3.84  | 1.08.E-03 |
| 3216   | HOXB6     | homeobox B6                                             | -3.84 | 1.08.E-03 |
| 57533  | TBC1D14   | TBC1 domain family member 14                            | 3.83  | 1.09.E-03 |
| 987    | LRBA      | LPS responsive beige-like anchor protein                | 3.83  | 1.09.E-03 |
| 199    | AIF1      | allograft inflammatory factor 1                         | 3.83  | 1.10.E-03 |
| 23406  | COTL1     | coactosin like F-actin binding protein 1                | 3.83  | 1.11.E-03 |
| 57380  | MRS2      | MRS2, magnesium transporter                             | -3.83 | 1.11.E-03 |
| 23597  | ACOT9     | acyl-CoA thioesterase 9                                 | 3.83  | 1.11.E-03 |
| 55840  | EAF2      | ELL associated factor 2                                 | 3.82  | 1.12.E-03 |
| 51320  | MEX3C     | mex-3 RNA binding family member C                       | -3.82 | 1.12.E-03 |
| 116159 | CYR1      | cysteine and tyrosine rich 1                            | -3.82 | 1.15.E-03 |
| 53834  | FGFRL1    | fibroblast growth factor receptor-like 1                | -3.81 | 1.17.E-03 |
| 124222 | PAQR4     | progesterone and adipoQ receptor family member 4        | 3.81  | 1.17.E-03 |
| 231    | AKR1B1    | aldo-keto reductase family 1 member B                   | 3.81  | 1.19.E-03 |
| 57546  | PDP2      | pyruvate dehydrogenase phosphatase catalytic subunit 2  | -3.81 | 1.20.E-03 |
| 23235  | SIK2      | salt inducible kinase 2                                 | -3.81 | 1.20.E-03 |
| 64965  | MRPS9     | mitochondrial ribosomal protein S9                      | -3.81 | 1.20.E-03 |
| 4267   | CD99      | CD99 molecule                                           | 3.81  | 1.21.E-03 |
| 5833   | PCYT2     | phosphate cytidyltransferase 2, ethanolamine            | -3.80 | 1.21.E-03 |
| 1203   | CLN5      | ceroid-lipofuscinosis, neuronal 5                       | 3.80  | 1.21.E-03 |
| 56886  | UGGT1     | UDP-glucose glycoprotein glucosyltransferase 1          | 3.79  | 1.29.E-03 |
| 83483  | PLVAP     | plasmalemma vesicle associated protein                  | 3.79  | 1.30.E-03 |
| 1491   | CTH       | cystathionine gamma-lyase                               | -3.79 | 1.31.E-03 |
| 81502  | HM13      | histocompatibility minor 13                             | 3.79  | 1.31.E-03 |
| 2162   | F13A1     | coagulation factor XIII A chain                         | 3.79  | 1.31.E-03 |
| 3111   | HLA-DOA   | major histocompatibility complex, class II, DO alpha    | 3.79  | 1.31.E-03 |
| 10653  | SPINT2    | serine peptidase inhibitor, Kunitz type 2               | 3.78  | 1.32.E-03 |
| 79171  | RBM42     | RNA binding motif protein 42                            | 3.78  | 1.32.E-03 |
| 3965   | LGALS9    | galectin 9                                              | 3.78  | 1.32.E-03 |
| 717    | C2        | complement C2                                           | 3.78  | 1.33.E-03 |
| 25996  | REXO2     | RNA exonuclease 2                                       | 3.78  | 1.33.E-03 |
| 1478   | CSTF2     | cleavage stimulation factor subunit 2                   | 3.78  | 1.32.E-03 |
| 3912   | LAMB1     | laminin subunit beta 1                                  | -3.78 | 1.33.E-03 |
| 81888  | HYI       | hydroxypyruvate isomerase (putative)                    | -3.78 | 1.33.E-03 |

|        |           |                                                                                 |       |           |
|--------|-----------|---------------------------------------------------------------------------------|-------|-----------|
| 401052 | LOC401052 | uncharacterized LOC401052                                                       | -3.78 | 1.33.E-03 |
| 5641   | LGMN      | legumain                                                                        | 3.78  | 1.34.E-03 |
| 89846  | FGD3      | FYVE, RhoGEF and PH domain containing 3                                         | 3.77  | 1.35.E-03 |
| 4067   | LYN       | LYN proto-oncogene, Src family tyrosine kinase                                  | 3.77  | 1.35.E-03 |
| 1290   | COL5A2    | collagen type V alpha 2 chain                                                   | 3.77  | 1.36.E-03 |
| 54963  | UCKL1     | uridine-cytidine kinase 1 like 1                                                | -3.77 | 1.39.E-03 |
| 6210   | RPS15A    | ribosomal protein S15a                                                          | -3.77 | 1.40.E-03 |
| 10370  | CITED2    | Cbp/p300 interacting transactivator with Glu/Asp rich carboxy-terminal domain 2 | -3.76 | 1.42.E-03 |
| 54941  | RNF125    | ring finger protein 125                                                         | -3.76 | 1.42.E-03 |
| 6282   | S100A11   | S100 calcium binding protein A11                                                | 3.76  | 1.42.E-03 |
| 54749  | EPDR1     | ependymin related 1                                                             | 3.76  | 1.43.E-03 |
| 8460   | TPST1     | tyrosylprotein sulfotransferase 1                                               | -3.76 | 1.43.E-03 |
| 643837 | LINC01128 | long intergenic non-protein coding RNA 1128                                     | -3.76 | 1.43.E-03 |
| 8925   | HERC1     | HECT and RLD domain containing E3 ubiquitin protein ligase family member 1      | -3.76 | 1.43.E-03 |
| 80820  | EEPD1     | endonuclease/exonuclease/phosphatase family domain containing 1                 | -3.76 | 1.43.E-03 |
| 10226  | PLIN3     | perilipin 3                                                                     | 3.75  | 1.47.E-03 |
| 23411  | SIRT1     | sirtuin 1                                                                       | -3.75 | 1.47.E-03 |
| 10046  | MAMLD1    | mastermind like domain containing 1                                             | -3.75 | 1.47.E-03 |
| 54913  | RPP25     | ribonuclease P/MRP subunit p25                                                  | 3.75  | 1.47.E-03 |
| 6424   | SFRP4     | secreted frizzled related protein 4                                             | 3.75  | 1.47.E-03 |
| 8718   | TNFRSF25  | TNF receptor superfamily member 25                                              | 3.75  | 1.47.E-03 |
| 3954   | LETM1     | leucine zipper and EF-hand containing transmembrane protein 1                   | -3.75 | 1.49.E-03 |
| 65009  | NDRG4     | NDRG family member 4                                                            | -3.74 | 1.49.E-03 |
| 81622  | UNC93B1   | unc-93 homolog B1 (C. elegans)                                                  | 3.74  | 1.49.E-03 |
| 23517  | SKIV2L2   | Ski2 like RNA helicase 2                                                        | -3.74 | 1.49.E-03 |
| 55288  | RHOT1     | ras homolog family member T1                                                    | -3.74 | 1.49.E-03 |
| 8445   | DYRK2     | dual specificity tyrosine phosphorylation regulated kinase 2                    | 3.74  | 1.49.E-03 |
| 5054   | SERPINE1  | serpin family E member 1                                                        | 3.74  | 1.49.E-03 |
| 6913   | TBX15     | T-box 15                                                                        | -3.74 | 1.49.E-03 |
| 57669  | EPB41L5   | erythrocyte membrane protein band 4.1 like 5                                    | -3.74 | 1.51.E-03 |
| 6643   | SNX2      | sorting nexin 2                                                                 | 3.73  | 1.51.E-03 |
| 10148  | EBI3      | Epstein-Barr virus induced 3                                                    | 3.73  | 1.51.E-03 |
| 10398  | MYL9      | myosin light chain 9                                                            | 3.73  | 1.51.E-03 |
| 2131   | EXT1      | exostosin glycosyltransferase 1                                                 | 3.73  | 1.51.E-03 |
| 7533   | YWHAH     | tyrosine 3-monooxygenase/tryptophan 5-monooxygenase activation protein eta      | 3.73  | 1.52.E-03 |
| 55186  | SLC25A36  | solute carrier family 25 member 36                                              | -3.73 | 1.52.E-03 |
| 27106  | ARRDC2    | arrestin domain containing 2                                                    | 3.73  | 1.52.E-03 |
| 10654  | PMVK      | phosphomevalonate kinase                                                        | 3.73  | 1.52.E-03 |
| 24145  | PANX1     | pannexin 1                                                                      | 3.73  | 1.52.E-03 |
| 1612   | DAPK1     | death associated protein kinase 1                                               | 3.73  | 1.52.E-03 |
| 130399 | ACVR1C    | activin A receptor type 1C                                                      | -3.73 | 1.52.E-03 |
| 79947  | DHDDS     | dehydrodolichyl diphosphate synthase subunit                                    | 3.73  | 1.53.E-03 |
| 114883 | OSBPL9    | oxysterol binding protein like 9                                                | 3.72  | 1.54.E-03 |
| 51816  | CECR1     | cat eye syndrome chromosome region, candidate 1                                 | 3.72  | 1.56.E-03 |
| 607    | BCL9      | B-cell CLL/lymphoma 9                                                           | -3.72 | 1.57.E-03 |
| 10240  | MRPS31    | mitochondrial ribosomal protein S31                                             | -3.72 | 1.58.E-03 |
| 374291 | NDUFS7    | NADH:ubiquinone oxidoreductase core subunit S7                                  | -3.72 | 1.59.E-03 |
| 80851  | SH3BP5L   | SH3 binding domain protein 5 like                                               | 3.72  | 1.60.E-03 |
| 7881   | KCNAB1    | potassium voltage-gated channel subfamily A member regulatory beta subunit 1    | -3.71 | 1.61.E-03 |
| 6352   | CCL5      | C-C motif chemokine ligand 5                                                    | 3.71  | 1.61.E-03 |
| 2178   | FANCE     | Fanconi anemia complementation group E                                          | -3.71 | 1.61.E-03 |
| 23203  | PMPCA     | peptidase, mitochondrial processing alpha subunit                               | -3.71 | 1.61.E-03 |
| 10857  | PGRMC1    | progesterone receptor membrane component 1                                      | -3.71 | 1.61.E-03 |
| 9334   | B4GALT5   | beta-1,4-galactosyltransferase 5                                                | 3.71  | 1.61.E-03 |
| 2246   | FGF1      | fibroblast growth factor 1                                                      | 3.71  | 1.62.E-03 |
| 5230   | PGK1      | phosphoglycerate kinase 1                                                       | 3.71  | 1.62.E-03 |
| 2592   | GALT      | galactose-1-phosphate uridylyltransferase                                       | -3.71 | 1.62.E-03 |
| 51560  | RAB6B     | RAB6B, member RAS oncogene family                                               | 3.71  | 1.63.E-03 |
| 6039   | RNASE6    | ribonuclease A family member k6                                                 | 3.70  | 1.64.E-03 |
| 10289  | EIF1B     | eukaryotic translation initiation factor 1B                                     | -3.70 | 1.66.E-03 |
| 5034   | P4HB      | prolyl 4-hydroxylase subunit beta                                               | 3.70  | 1.66.E-03 |
| 757    | TMEM50B   | transmembrane protein 50B                                                       | -3.70 | 1.67.E-03 |
| 9308   | CD83      | CD83 molecule                                                                   | 3.70  | 1.68.E-03 |
| 144132 | DNHD1     | dynein heavy chain domain 1                                                     | -3.70 | 1.68.E-03 |
| 2639   | GCDH      | glutaryl-CoA dehydrogenase                                                      | -3.70 | 1.68.E-03 |
| 79624  | ARMT1     | acidic residue methyltransferase 1                                              | -3.70 | 1.68.E-03 |
| 10808  | HSPH1     | heat shock protein family H (Hsp110) member 1                                   | 3.69  | 1.69.E-03 |



|        |          |                                                                                         |       |           |
|--------|----------|-----------------------------------------------------------------------------------------|-------|-----------|
| 79180  | EFHD2    | EF-hand domain family member D2                                                         | 3.69  | 1.69.E-03 |
| 51150  | SDF4     | stromal cell derived factor 4                                                           | 3.69  | 1.71.E-03 |
| 10788  | IQGAP2   | IQ motif containing GTPase activating protein 2                                         | 3.69  | 1.73.E-03 |
| 441549 | CDNF     | cerebral dopamine neurotrophic factor                                                   | -3.69 | 1.74.E-03 |
| 63940  | GPSM3    | G-protein signaling modulator 3                                                         | 3.69  | 1.73.E-03 |
| 84318  | CCDC77   | coiled-coil domain containing 77                                                        | 3.68  | 1.75.E-03 |
| 6335   | SCN9A    | sodium voltage-gated channel alpha subunit 9                                            | 3.68  | 1.75.E-03 |
| 387    | RHOA     | ras homolog family member A                                                             | 3.68  | 1.77.E-03 |
| 6390   | SDHB     | succinate dehydrogenase complex iron sulfur subunit B                                   | -3.68 | 1.77.E-03 |
| 330    | BIRC3    | baculoviral IAP repeat containing 3                                                     | 3.68  | 1.78.E-03 |
| 6902   | TBCA     | tubulin folding cofactor A                                                              | -3.68 | 1.78.E-03 |
| 157922 | CAMSAP1  | calmodulin regulated spectrin associated protein 1                                      | -3.68 | 1.78.E-03 |
| 55711  | FAR2     | fatty acyl-CoA reductase 2                                                              | 3.68  | 1.78.E-03 |
| 10870  | HCST     | hematopoietic cell signal transducer                                                    | 3.67  | 1.79.E-03 |
| 6208   | RPS14    | ribosomal protein S14                                                                   | -3.67 | 1.79.E-03 |
| 1027   | CDKN1B   | cyclin dependent kinase inhibitor 1B                                                    | -3.67 | 1.79.E-03 |
| 5445   | PON2     | paraoxonase 2                                                                           | 3.67  | 1.79.E-03 |
| 944    | TNFSF8   | tumor necrosis factor superfamily member 8                                              | 3.67  | 1.80.E-03 |
| 1490   | CTGF     | connective tissue growth factor                                                         | 3.66  | 1.83.E-03 |
| 55714  | TENM3    | teneurin transmembrane protein 3                                                        | -3.66 | 1.84.E-03 |
| 64969  | MRPS5    | mitochondrial ribosomal protein S5                                                      | -3.66 | 1.85.E-03 |
| 56950  | SMYD2    | SET and MYND domain containing 2                                                        | 3.66  | 1.87.E-03 |
| 11025  | LILRB3   | leukocyte immunoglobulin like receptor B3                                               | 3.66  | 1.87.E-03 |
| 63892  | THADA    | THADA, armadillo repeat containing                                                      | 3.66  | 1.87.E-03 |
| 10778  | ZNF271P  | zinc finger protein 271, pseudogene                                                     | 3.65  | 1.88.E-03 |
| 51284  | TLR7     | toll like receptor 7                                                                    | 3.65  | 1.88.E-03 |
| 23462  | HEY1     | hes related family bHLH transcription factor with YRPW motif 1                          | -3.65 | 1.87.E-03 |
| 2690   | GHR      | growth hormone receptor                                                                 | -3.65 | 1.87.E-03 |
| 25907  | TMEM158  | transmembrane protein 158 (gene/pseudogene)                                             | 3.65  | 1.87.E-03 |
| 55577  | NAGK     | N-acetylglucosamine kinase                                                              | 3.65  | 1.89.E-03 |
| 116255 | MOGAT1   | monoacylglycerol O-acyltransferase 1                                                    | -3.64 | 1.92.E-03 |
| 64744  | SMAP2    | small ArfGAP2                                                                           | 3.64  | 1.94.E-03 |
| 93210  | PGAP3    | post-GPI attachment to proteins 3                                                       | 3.64  | 1.95.E-03 |
| 55704  | CCDC88A  | coiled-coil domain containing 88A                                                       | 3.64  | 1.96.E-03 |
| 5880   | RAC2     | ras-related C3 botulinum toxin substrate 2 (rho family, small GTP binding protein Rac2) | 3.64  | 1.96.E-03 |
| 50808  | AK3      | adenylate kinase 3                                                                      | -3.64 | 1.96.E-03 |
| 55605  | KIF21A   | kinesin family member 21A                                                               | -3.64 | 1.98.E-03 |
| 23743  | BHMT2    | betaine-homocysteine S-methyltransferase 2                                              | 3.63  | 1.99.E-03 |
| 10492  | SYNCRIP  | synaptotagmin binding cytoplasmic RNA interacting protein                               | 3.63  | 1.99.E-03 |
| 6586   | SLIT3    | slit guidance ligand 3                                                                  | 3.63  | 1.99.E-03 |
| 689    | BTF3     | basic transcription factor 3                                                            | -3.63 | 2.01.E-03 |
| 115201 | ATG4A    | autophagy related 4A cysteine peptidase                                                 | 3.63  | 2.01.E-03 |
| 2999   | GZMH     | granzyme H                                                                              | 3.63  | 2.01.E-03 |
| 23028  | KDM1A    | lysine demethylase 1A                                                                   | -3.63 | 2.02.E-03 |
| 221504 | ZBTB9    | zinc finger and BTB domain containing 9                                                 | -3.63 | 2.02.E-03 |
| 64776  | C11orf1  | chromosome 11 open reading frame 1                                                      | -3.62 | 2.02.E-03 |
| 54883  | CWC25    | CWC25 spliceosome associated protein homolog                                            | -3.62 | 2.02.E-03 |
| 9404   | LPXN     | leupaxin                                                                                | 3.62  | 2.04.E-03 |
| 2519   | FUCA2    | fucosidase, alpha-L- 2, plasma                                                          | 3.62  | 2.07.E-03 |
| 695    | BTK      | Bruton tyrosine kinase                                                                  | 3.62  | 2.08.E-03 |
| 7965   | AIMP2    | aminoacyl tRNA synthetase complex interacting multifunctional protein 2                 | 3.62  | 2.09.E-03 |
| 54436  | SH3TC1   | SH3 domain and tetratricopeptide repeats 1                                              | 3.62  | 2.09.E-03 |
| 26589  | MRPL46   | mitochondrial ribosomal protein L46                                                     | -3.62 | 2.09.E-03 |
| 6419   | SETMAR   | SET domain and mariner transposase fusion gene                                          | -3.61 | 2.10.E-03 |
| 54440  | SASH3    | SAM and SH3 domain containing 3                                                         | 3.61  | 2.13.E-03 |
| 1200   | TPP1     | tripeptidyl peptidase 1                                                                 | 3.61  | 2.15.E-03 |
| 5265   | SERPINA1 | serpin family A member 1                                                                | 3.61  | 2.15.E-03 |
| 7280   | TUBB2A   | tubulin beta 2A class IIa                                                               | 3.61  | 2.15.E-03 |
| 10938  | EHD1     | EH domain containing 1                                                                  | -3.61 | 2.16.E-03 |
| 5549   | PRELP    | proline and arginine rich end leucine rich repeat protein                               | 3.60  | 2.16.E-03 |
| 11331  | PHB2     | prohibitin 2                                                                            | -3.60 | 2.17.E-03 |
| 54502  | RBM47    | RNA binding motif protein 47                                                            | 3.60  | 2.17.E-03 |
| 83442  | SH3BGR3  | SH3 domain binding glutamate rich protein like 3                                        | 3.60  | 2.18.E-03 |
| 160897 | GPR180   | G protein-coupled receptor 180                                                          | -3.60 | 2.18.E-03 |
| 64210  | MMS19    | MMS19 homolog, cytosolic iron-sulfur assembly component                                 | -3.60 | 2.18.E-03 |
| 9488   | PIGB     | phosphatidylinositol glycan anchor biosynthesis class B                                 | 3.60  | 2.20.E-03 |
| 1786   | DNMT1    | DNA methyltransferase 1                                                                 | 3.59  | 2.20.E-03 |

|        |          |                                                                 |       |           |
|--------|----------|-----------------------------------------------------------------|-------|-----------|
| 64374  | SIL1     | SIL1 nucleotide exchange factor                                 | 3.59  | 2.22.E-03 |
| 1534   | CYB561   | cytochrome b561                                                 | 3.59  | 2.22.E-03 |
| 5372   | PMM1     | phosphomannomutase 1                                            | -3.59 | 2.21.E-03 |
| 377    | ARF3     | ADP ribosylation factor 3                                       | 3.59  | 2.23.E-03 |
| 84140  | FAM161A  | family with sequence similarity 161 member A                    | -3.59 | 2.24.E-03 |
| 826    | CAPNS1   | calpain small subunit 1                                         | 3.59  | 2.26.E-03 |
| 8864   | PER2     | period circadian clock 2                                        | -3.59 | 2.26.E-03 |
| 133584 | EGFLAM   | EGF like, fibronectin type III and laminin G domains            | -3.59 | 2.26.E-03 |
| 6261   | RYR1     | ryanodine receptor 1                                            | 3.59  | 2.26.E-03 |
| 3820   | KLRB1    | killer cell lectin like receptor B1                             | 3.58  | 2.28.E-03 |
| 10618  | TGOLN2   | trans-golgi network protein 2                                   | 3.58  | 2.28.E-03 |
| 3689   | ITGB2    | integrin subunit beta 2                                         | 3.58  | 2.28.E-03 |
| 23336  | SYNM     | synemin                                                         | 3.58  | 2.30.E-03 |
| 349565 | NMNAT3   | nicotinamide nucleotide adenyltransferase 3                     | -3.58 | 2.31.E-03 |
| 7405   | UVRAG    | UV radiation resistance associated                              | -3.58 | 2.31.E-03 |
| 8439   | NSMAF    | neutral sphingomyelinase activation associated factor           | 3.58  | 2.31.E-03 |
| 131118 | DNAJC19  | DnaJ heat shock protein family (Hsp40) member C19               | -3.58 | 2.30.E-03 |
| 191    | AHCY     | adenosylhomocysteinase                                          | 3.58  | 2.31.E-03 |
| 1841   | DTYMK    | deoxythymidylate kinase                                         | 3.58  | 2.31.E-03 |
| 8320   | EOMES    | eomesodermin                                                    | 3.58  | 2.31.E-03 |
| 11314  | CD300A   | CD300a molecule                                                 | 3.58  | 2.32.E-03 |
| 10752  | CHL1     | cell adhesion molecule L1 like                                  | -3.58 | 2.31.E-03 |
| 124935 | SLC43A2  | solute carrier family 43 member 2                               | 3.57  | 2.31.E-03 |
| 8685   | MARCO    | macrophage receptor with collagenous structure                  | 3.57  | 2.32.E-03 |
| 586    | BCAT1    | branched chain amino acid transaminase 1                        | 3.57  | 2.32.E-03 |
| 10209  | EIF1     | eukaryotic translation initiation factor 1                      | -3.57 | 2.33.E-03 |
| 7779   | SLC30A1  | solute carrier family 30 member 1                               | 3.57  | 2.32.E-03 |
| 9980   | DOPEY2   | dopey family member 2                                           | 3.57  | 2.33.E-03 |
| 55140  | ELP3     | elongator acetyltransferase complex subunit 3                   | 3.57  | 2.33.E-03 |
| 6916   | TBXAS1   | thromboxane A synthase 1                                        | 3.57  | 2.37.E-03 |
| 4689   | NCF4     | neutrophil cytosolic factor 4                                   | 3.57  | 2.37.E-03 |
| 55070  | DET1     | de-etiolated homolog 1 (Arabidopsis)                            | -3.57 | 2.38.E-03 |
| 10130  | PDIA6    | protein disulfide isomerase family A member 6                   | 3.57  | 2.39.E-03 |
| 6667   | SP1      | Sp1 transcription factor                                        | -3.56 | 2.39.E-03 |
| 220388 | CCDC89   | coiled-coil domain containing 89                                | 3.56  | 2.40.E-03 |
| 84886  | C1orf198 | chromosome 1 open reading frame 198                             | 3.56  | 2.45.E-03 |
| 80318  | GKAP1    | G kinase anchoring protein 1                                    | -3.56 | 2.49.E-03 |
| 8411   | EEA1     | early endosome antigen 1                                        | 3.55  | 2.51.E-03 |
| 4837   | NNMT     | nicotinamide N-methyltransferase                                | 3.55  | 2.52.E-03 |
| 1043   | CD52     | CD52 molecule                                                   | 3.55  | 2.52.E-03 |
| 23414  | ZFPM2    | zinc finger protein, FOG family member 2                        | -3.55 | 2.54.E-03 |
| 27102  | EIF2AK1  | eukaryotic translation initiation factor 2 alpha kinase 1       | 3.55  | 2.54.E-03 |
| 57415  | C3orf14  | chromosome 3 open reading frame 14                              | 3.55  | 2.54.E-03 |
| 261729 | STEAP2   | STEAP2 metalloreductase                                         | 3.55  | 2.57.E-03 |
| 80023  | NRSN2    | neurensin 2                                                     | -3.54 | 2.59.E-03 |
| 10266  | RAMP2    | receptor activity modifying protein 2                           | -3.54 | 2.58.E-03 |
| 84935  | MEDAG    | mesenteric estrogen dependent adipogenesis                      | 3.54  | 2.59.E-03 |
| 196463 | PLBD2    | phospholipase B domain containing 2                             | 3.54  | 2.59.E-03 |
| 84695  | LOXL3    | lysyl oxidase like 3                                            | 3.54  | 2.60.E-03 |
| 1119   | CHKA     | choline kinase alpha                                            | -3.54 | 2.61.E-03 |
| 11316  | COPE     | coatamer protein complex subunit epsilon                        | 3.54  | 2.60.E-03 |
| 5621   | PRNP     | prion protein                                                   | 3.54  | 2.61.E-03 |
| 103910 | MYL12B   | myosin light chain 12B                                          | 3.54  | 2.62.E-03 |
| 7852   | CXCR4    | C-X-C motif chemokine receptor 4                                | 3.54  | 2.62.E-03 |
| 8677   | STX10    | syntaxin 10                                                     | 3.54  | 2.63.E-03 |
| 2195   | FAT1     | FAT atypical cadherin 1                                         | 3.54  | 2.64.E-03 |
| 10320  | IKZF1    | IKAROS family zinc finger 1                                     | 3.54  | 2.64.E-03 |
| 23224  | SYNE2    | spectrin repeat containing nuclear envelope protein 2           | -3.54 | 2.65.E-03 |
| 963    | CD53     | CD53 molecule                                                   | 3.53  | 2.66.E-03 |
| 80310  | PDGFD    | platelet derived growth factor D                                | 3.53  | 2.66.E-03 |
| 54491  | FAM105A  | family with sequence similarity 105 member A                    | 3.53  | 2.67.E-03 |
| 159371 | SLC35G1  | solute carrier family 35 member G1                              | 3.53  | 2.67.E-03 |
| 8863   | PER3     | period circadian clock 3                                        | -3.53 | 2.68.E-03 |
| 51144  | HSD17B12 | hydroxysteroid 17-beta dehydrogenase 12                         | -3.53 | 2.68.E-03 |
| 91860  | CALML4   | calmodulin like 4                                               | 3.53  | 2.70.E-03 |
| 5007   | OSBP     | oxysterol binding protein                                       | -3.53 | 2.70.E-03 |
| 8028   | MLLT10   | myeloid/lymphoid or mixed-lineage leukemia; translocated to, 10 | -3.53 | 2.70.E-03 |

|        |           |                                                                           |       |           |
|--------|-----------|---------------------------------------------------------------------------|-------|-----------|
| 971    | CD72      | CD72 molecule                                                             | 3.52  | 2.71.E-03 |
| 222256 | CDHR3     | cadherin related family member 3                                          | -3.52 | 2.73.E-03 |
| 2124   | EVI2B     | ecotropic viral integration site 2B                                       | 3.52  | 2.75.E-03 |
| 57171  | DOLPP1    | dolichyldiphosphatase 1                                                   | -3.52 | 2.75.E-03 |
| 8703   | B4GALT3   | beta-1,4-galactosyltransferase 3                                          | -3.52 | 2.76.E-03 |
| 252969 | NEIL2     | nei like DNA glycosylase 2                                                | 3.52  | 2.77.E-03 |
| 7030   | TFE3      | transcription factor binding to IGHM enhancer 3                           | 3.52  | 2.77.E-03 |
| 4239   | MFAP4     | microfibrillar associated protein 4                                       | 3.52  | 2.78.E-03 |
| 366    | AQP9      | aquaporin 9                                                               | 3.52  | 2.79.E-03 |
| 90102  | PHLDB2    | pleckstrin homology like domain family B member 2                         | -3.52 | 2.79.E-03 |
| 115572 | FAM46B    | family with sequence similarity 46 member B                               | -3.52 | 2.79.E-03 |
| 92400  | RBM18     | RNA binding motif protein 18                                              | -3.51 | 2.81.E-03 |
| 2617   | GARS      | glycyl-tRNA synthetase                                                    | 3.51  | 2.81.E-03 |
| 93343  | MVB12A    | multivesicular body subunit 12A                                           | 3.51  | 2.83.E-03 |
| 4256   | MGP       | matrix Gla protein                                                        | 3.51  | 2.84.E-03 |
| 64175  | P3H1      | prolyl 3-hydroxylase 1                                                    | 3.51  | 2.85.E-03 |
| 51087  | YBX2      | Y-box binding protein 2                                                   | -3.51 | 2.86.E-03 |
| 83608  | C18orf21  | chromosome 18 open reading frame 21                                       | -3.50 | 2.86.E-03 |
| 7805   | LAPTM5    | lysosomal protein transmembrane 5                                         | 3.50  | 2.87.E-03 |
| 23609  | MKRN2     | makorin ring finger protein 2                                             | -3.50 | 2.89.E-03 |
| 55356  | SLC22A15  | solute carrier family 22 member 15                                        | 3.50  | 2.88.E-03 |
| 8717   | TRADD     | TNFRSF1A associated via death domain                                      | 3.50  | 2.88.E-03 |
| 3099   | HK2       | hexokinase 2                                                              | -3.50 | 2.88.E-03 |
| 27154  | BRPF3     | bromodomain and PHD finger containing 3                                   | -3.50 | 2.88.E-03 |
| 8535   | CBX4      | chromobox 4                                                               | 3.50  | 2.91.E-03 |
| 540    | ATP7B     | ATPase copper transporting beta                                           | -3.50 | 2.93.E-03 |
| 252995 | FNDC5     | fibronectin type III domain containing 5                                  | -3.49 | 2.94.E-03 |
| 23705  | CADM1     | cell adhesion molecule 1                                                  | -3.49 | 2.95.E-03 |
| 593    | BCKDHA    | branched chain keto acid dehydrogenase E1, alpha polypeptide              | -3.49 | 2.94.E-03 |
| 2167   | FABP4     | fatty acid binding protein 4                                              | -3.49 | 2.96.E-03 |
| 10871  | CD300C    | CD300c molecule                                                           | 3.49  | 2.96.E-03 |
| 11167  | FSTL1     | follistatin like 1                                                        | 3.49  | 2.96.E-03 |
| 10495  | ENOX2     | ecto-NOX disulfide-thiol exchanger 2                                      | 3.49  | 2.99.E-03 |
| 285590 | SH3PXD2B  | SH3 and PX domains 2B                                                     | 3.49  | 3.02.E-03 |
| 6277   | S100A6    | S100 calcium binding protein A6                                           | 3.49  | 3.02.E-03 |
| 80183  | RUBCNL    | RUN and cysteine rich domain containing beclin 1 interacting protein like | 3.49  | 3.02.E-03 |
| 84858  | ZNF503    | zinc finger protein 503                                                   | 3.48  | 3.04.E-03 |
| 8839   | WISP2     | WNT1 inducible signaling pathway protein 2                                | 3.48  | 3.05.E-03 |
| 3212   | HOXB2     | homeobox B2                                                               | -3.48 | 3.06.E-03 |
| 9249   | DHRS3     | dehydrogenase/reductase 3                                                 | -3.48 | 3.09.E-03 |
| 64333  | ARHGAP9   | Rho GTPase activating protein 9                                           | 3.48  | 3.11.E-03 |
| 4650   | MYO9B     | myosin IXB                                                                | 3.47  | 3.13.E-03 |
| 9588   | PRDX6     | peroxiredoxin 6                                                           | -3.47 | 3.14.E-03 |
| 3115   | HLA-DPB1  | major histocompatibility complex, class II, DP beta 1                     | 3.47  | 3.16.E-03 |
| 1780   | DYNC111   | dynein cytoplasmic 1 intermediate chain 1                                 | 3.47  | 3.16.E-03 |
| 83607  | AMMECR1L  | AMMECR1 like                                                              | -3.47 | 3.18.E-03 |
| 23165  | NUP205    | nucleoporin 205                                                           | 3.47  | 3.19.E-03 |
| 2908   | NR3C1     | nuclear receptor subfamily 3 group C member 1                             | -3.47 | 3.19.E-03 |
| 4363   | ABCC1     | ATP binding cassette subfamily C member 1                                 | 3.47  | 3.19.E-03 |
| 51291  | GMIP      | GEM interacting protein                                                   | 3.47  | 3.19.E-03 |
| 8309   | ACOX2     | acyl-CoA oxidase 2                                                        | -3.47 | 3.19.E-03 |
| 4706   | NDUFAB1   | NADH:ubiquinone oxidoreductase subunit AB1                                | -3.47 | 3.19.E-03 |
| 118429 | ANTXR2    | anthrax toxin receptor 2                                                  | -3.47 | 3.18.E-03 |
| 728    | C5AR1     | complement C5a receptor 1                                                 | 3.46  | 3.23.E-03 |
| 7417   | VDAC2     | voltage dependent anion channel 2                                         | -3.46 | 3.23.E-03 |
| 1794   | DOCK2     | dedicator of cytokinesis 2                                                | 3.46  | 3.23.E-03 |
| 8165   | AKAP1     | A-kinase anchoring protein 1                                              | -3.46 | 3.24.E-03 |
| 9262   | STK17B    | serine/threonine kinase 17b                                               | 3.46  | 3.25.E-03 |
| 6545   | SLC7A4    | solute carrier family 7 member 4                                          | 3.46  | 3.25.E-03 |
| 2875   | GPT       | glutamic--pyruvic transaminase                                            | -3.46 | 3.26.E-03 |
| 349152 | DPY19L2P2 | DPY19L2 pseudogene 2                                                      | -3.46 | 3.25.E-03 |
| 64789  | EXO5      | exonuclease 5                                                             | 3.46  | 3.26.E-03 |
| 9124   | PDLIM1    | PDZ and LIM domain 1                                                      | 3.46  | 3.26.E-03 |
| 79411  | GLB1L     | galactosidase beta 1 like                                                 | 3.46  | 3.27.E-03 |
| 54823  | SWT1      | SWT1, RNA endoribonuclease homolog                                        | -3.46 | 3.29.E-03 |
| 153769 | SH3RF2    | SH3 domain containing ring finger 2                                       | 3.46  | 3.30.E-03 |
| 10908  | PNPLA6    | patatin like phospholipase domain containing 6                            | 3.45  | 3.31.E-03 |

|        |           |                                                                  |       |           |
|--------|-----------|------------------------------------------------------------------|-------|-----------|
| 8702   | B4GALT4   | beta-1,4-galactosyltransferase 4                                 | 3.45  | 3.30.E-03 |
| 122525 | C14orf28  | chromosome 14 open reading frame 28                              | -3.45 | 3.32.E-03 |
| 1271   | CNTFR     | ciliary neurotrophic factor receptor                             | -3.45 | 3.35.E-03 |
| 10245  | TIMM17B   | translocase of inner mitochondrial membrane 17 homolog B (yeast) | -3.45 | 3.35.E-03 |
| 2217   | FCGRT     | Fc fragment of IgG receptor and transporter                      | 3.45  | 3.36.E-03 |
| 54764  | ZRANB1    | zinc finger RANBP2-type containing 1                             | -3.45 | 3.36.E-03 |
| 11259  | FILIP1L   | filamin A interacting protein 1 like                             | 3.45  | 3.37.E-03 |
| 219654 | ZCCHC24   | zinc finger CCHC-type containing 24                              | 3.45  | 3.38.E-03 |
| 64641  | EBF2      | early B-cell factor 2                                            | -3.45 | 3.38.E-03 |
| 11010  | GLIPR1    | GLI pathogenesis related 1                                       | 3.44  | 3.39.E-03 |
| 2495   | FBP1      | ferritin heavy chain 1                                           | 3.44  | 3.42.E-03 |
| 1760   | DMPK      | dystrophia myotonica protein kinase                              | 3.44  | 3.42.E-03 |
| 8660   | IRS2      | insulin receptor substrate 2                                     | -3.44 | 3.46.E-03 |
| 3113   | HLA-DPA1  | major histocompatibility complex, class II, DP alpha 1           | 3.44  | 3.46.E-03 |
| 9935   | MAFB      | MAF bZIP transcription factor B                                  | 3.44  | 3.47.E-03 |
| 4647   | MYO7A     | myosin VIIA                                                      | 3.44  | 3.47.E-03 |
| 9552   | SPAG7     | sperm associated antigen 7                                       | -3.44 | 3.49.E-03 |
| 8034   | SLC25A16  | solute carrier family 25 member 16                               | -3.44 | 3.49.E-03 |
| 51760  | SYT17     | synaptotagmin 17                                                 | -3.43 | 3.50.E-03 |
| 2960   | GTF2E1    | general transcription factor IIE subunit 1                       | 3.43  | 3.50.E-03 |
| 9967   | THRAP3    | thyroid hormone receptor associated protein 3                    | -3.43 | 3.52.E-03 |
| 51020  | HDCC2     | HD domain containing 2                                           | -3.43 | 3.54.E-03 |
| 1992   | SERPINB1  | serpin family B member 1                                         | 3.43  | 3.55.E-03 |
| 9604   | RNF14     | ring finger protein 14                                           | 3.43  | 3.57.E-03 |
| 27247  | NFU1      | NFU1 iron-sulfur cluster scaffold                                | -3.42 | 3.61.E-03 |
| 90423  | ATP6V1E2  | ATPase H+ transporting V1 subunit E2                             | -3.42 | 3.62.E-03 |
| 29926  | GMPPA     | GDP-mannose pyrophosphorylase A                                  | 3.42  | 3.63.E-03 |
| 116441 | TM4SF18   | transmembrane 4 L six family member 18                           | -3.42 | 3.63.E-03 |
| 4753   | NELL2     | neural EGFL like 2                                               | 3.42  | 3.63.E-03 |
| 23136  | EPB41L3   | erythrocyte membrane protein band 4.1 like 3                     | 3.42  | 3.65.E-03 |
| 51338  | MS4A4A    | membrane spanning 4-domains A4A                                  | 3.42  | 3.65.E-03 |
| 1230   | CCR1      | C-C motif chemokine receptor 1                                   | 3.42  | 3.67.E-03 |
| 55750  | AGK       | acylglycerol kinase                                              | -3.42 | 3.67.E-03 |
| 915    | CD3D      | CD3d molecule                                                    | 3.42  | 3.68.E-03 |
| 10060  | ABCC9     | ATP binding cassette subfamily C member 9                        | -3.41 | 3.71.E-03 |
| 220    | ALDH1A3   | aldehyde dehydrogenase 1 family member A3                        | 3.41  | 3.70.E-03 |
| 1072   | CFL1      | cofilin 1                                                        | 3.41  | 3.70.E-03 |
| 84888  | SPPL2A    | signal peptide peptidase like 2A                                 | 3.41  | 3.70.E-03 |
| 7289   | TULP3     | tubby like protein 3                                             | -3.41 | 3.74.E-03 |
| 11112  | HIBADH    | 3-hydroxyisobutyrate dehydrogenase                               | -3.41 | 3.75.E-03 |
| 9770   | RASSF2    | Ras association domain family member 2                           | 3.41  | 3.75.E-03 |
| 64764  | CREB3L2   | cAMP responsive element binding protein 3 like 2                 | 3.41  | 3.76.E-03 |
| 8424   | BBOX1     | gamma-butyrobetaine hydroxylase 1                                | 3.41  | 3.76.E-03 |
| 285195 | SLC9A9    | solute carrier family 9 member A9                                | 3.41  | 3.76.E-03 |
| 5784   | PTPN14    | protein tyrosine phosphatase, non-receptor type 14               | -3.41 | 3.75.E-03 |
| 1629   | DBT       | dihydrolipoamide branched chain transacylase E2                  | -3.41 | 3.76.E-03 |
| 4818   | NGK7      | natural killer cell granule protein 7                            | 3.41  | 3.75.E-03 |
| 11214  | AKAP13    | A-kinase anchoring protein 13                                    | 3.41  | 3.75.E-03 |
| 84791  | LINC00467 | long intergenic non-protein coding RNA 467                       | -3.41 | 3.75.E-03 |
| 22795  | NID2      | nidogen 2                                                        | -3.40 | 3.76.E-03 |
| 63874  | ABHD4     | abhydrolase domain containing 4                                  | 3.40  | 3.76.E-03 |
| 10461  | MERTK     | MER proto-oncogene, tyrosine kinase                              | 3.40  | 3.76.E-03 |
| 83892  | KCTD10    | potassium channel tetramerization domain containing 10           | 3.40  | 3.78.E-03 |
| 1948   | EFNB2     | ephrin B2                                                        | -3.40 | 3.80.E-03 |
| 222389 | BEND7     | BEN domain containing 7                                          | -3.40 | 3.83.E-03 |
| 79415  | C17orf62  | chromosome 17 open reading frame 62                              | 3.40  | 3.83.E-03 |
| 5579   | PRKCB     | protein kinase C beta                                            | 3.40  | 3.83.E-03 |
| 57701  | NCKAP5L   | NCK associated protein 5 like                                    | 3.40  | 3.83.E-03 |
| 29062  | WDR91     | WD repeat domain 91                                              | 3.40  | 3.84.E-03 |
| 23335  | WDR7      | WD repeat domain 7                                               | 3.40  | 3.86.E-03 |
| 79581  | SLC52A2   | solute carrier family 52 member 2                                | 3.40  | 3.87.E-03 |
| 27010  | TPK1      | thiamin pyrophosphokinase 1                                      | 3.39  | 3.92.E-03 |
| 253959 | RALGAPA1  | Ral GTPase activating protein catalytic alpha subunit 1          | -3.39 | 3.98.E-03 |
| 80895  | ILKAP     | ILK associated serine/threonine phosphatase                      | -3.39 | 4.01.E-03 |
| 64116  | SLC39A8   | solute carrier family 39 member 8                                | 3.38  | 4.01.E-03 |
| 1152   | CKB       | creatine kinase B                                                | -3.38 | 4.02.E-03 |
| 4217   | MAP3K5    | mitogen-activated protein kinase kinase kinase 5                 | -3.38 | 4.06.E-03 |

|        |         |                                                         |       |           |
|--------|---------|---------------------------------------------------------|-------|-----------|
| 2219   | FCN1    | ficolin 1                                               | 3.38  | 4.06.E-03 |
| 124995 | MRPL10  | mitochondrial ribosomal protein L10                     | -3.38 | 4.09.E-03 |
| 397    | ARHGDIB | Rho GDP dissociation inhibitor beta                     | 3.38  | 4.10.E-03 |
| 25801  | GCA     | grancalcin                                              | 3.38  | 4.10.E-03 |
| 5604   | MAP2K1  | mitogen-activated protein kinase kinase 1               | 3.38  | 4.12.E-03 |
| 6159   | RPL29   | ribosomal protein L29                                   | -3.38 | 4.13.E-03 |
| 912    | CD1D    | CD1d molecule                                           | 3.37  | 4.14.E-03 |
| 164091 | PAQR7   | progesterin and adipoQ receptor family member 7         | 3.37  | 4.18.E-03 |
| 126364 | LRRC25  | leucine rich repeat containing 25                       | 3.37  | 4.17.E-03 |
| 3643   | INSR    | insulin receptor                                        | -3.37 | 4.17.E-03 |
| 51065  | RPS27L  | ribosomal protein S27 like                              | 3.37  | 4.18.E-03 |
| 55527  | FEM1A   | fem-1 homolog A                                         | -3.37 | 4.18.E-03 |
| 10213  | PSMD14  | proteasome 26S subunit, non-ATPase 14                   | 3.37  | 4.19.E-03 |
| 79148  | MMP28   | matrix metalloproteinase 28                             | 3.37  | 4.19.E-03 |
| 27335  | EIF3K   | eukaryotic translation initiation factor 3 subunit K    | -3.37 | 4.19.E-03 |
| 10247  | RIDA    | reactive intermediate imine deaminase A homolog         | -3.37 | 4.20.E-03 |
| 653140 | FAM228A | family with sequence similarity 228 member A            | -3.37 | 4.21.E-03 |
| 9182   | RASSF9  | Ras association domain family member 9                  | 3.37  | 4.22.E-03 |
| 59348  | ZNF350  | zinc finger protein 350                                 | 3.36  | 4.24.E-03 |
| 5476   | CTSA    | cathepsin A                                             | 3.36  | 4.24.E-03 |
| 1520   | CTSS    | cathepsin S                                             | 3.36  | 4.24.E-03 |
| 10390  | CEPT1   | choline/ethanolamine phosphotransferase 1               | -3.36 | 4.26.E-03 |
| 5096   | PCCB    | propionyl-CoA carboxylase beta subunit                  | -3.36 | 4.26.E-03 |
| 170954 | PPP1R18 | protein phosphatase 1 regulatory subunit 18             | 3.36  | 4.25.E-03 |
| 2006   | ELN     | elastin                                                 | 3.36  | 4.27.E-03 |
| 2110   | ETFDH   | electron transfer flavoprotein dehydrogenase            | -3.36 | 4.28.E-03 |
| 9159   | PCSK7   | proprotein convertase subtilisin/kexin type 7           | 3.36  | 4.29.E-03 |
| 8635   | RNASET2 | ribonuclease T2                                         | 3.36  | 4.29.E-03 |
| 1307   | COL16A1 | collagen type XVI alpha 1 chain                         | 3.35  | 4.33.E-03 |
| 152137 | CCDC50  | coiled-coil domain containing 50                        | -3.35 | 4.36.E-03 |
| 81493  | SYNC    | syncollin, intermediate filament protein                | 3.35  | 4.37.E-03 |
| 2888   | GRB14   | growth factor receptor bound protein 14                 | 3.35  | 4.37.E-03 |
| 23396  | PIP5K1C | phosphatidylinositol-4-phosphate 5-kinase type 1 gamma  | 3.35  | 4.37.E-03 |
| 2212   | FCGR2A  | Fc fragment of IgG receptor IIa                         | 3.35  | 4.37.E-03 |
| 375287 | RBM43   | RNA binding motif protein 43                            | -3.35 | 4.39.E-03 |
| 26031  | OSBPL3  | oxysterol binding protein like 3                        | 3.35  | 4.39.E-03 |
| 1071   | CETP    | cholesteryl ester transfer protein                      | -3.35 | 4.39.E-03 |
| 219972 | MPEG1   | macrophage expressed 1                                  | 3.35  | 4.40.E-03 |
| 4719   | NDUFS1  | NADH:ubiquinone oxidoreductase core subunit S1          | -3.35 | 4.42.E-03 |
| 93594  | TBC1D31 | TBC1 domain family member 31                            | 3.35  | 4.42.E-03 |
| 254042 | METAP1D | methionyl aminopeptidase type 1D, mitochondrial         | -3.35 | 4.41.E-03 |
| 11026  | LILRA3  | leukocyte immunoglobulin like receptor A3               | 3.34  | 4.46.E-03 |
| 8521   | GCM1    | glial cells missing homolog 1                           | -3.34 | 4.46.E-03 |
| 26053  | AUTS2   | autism susceptibility candidate 2                       | -3.34 | 4.46.E-03 |
| 10935  | PRDX3   | peroxiredoxin 3                                         | -3.34 | 4.47.E-03 |
| 8078   | USP5    | ubiquitin specific peptidase 5                          | 3.34  | 4.49.E-03 |
| 2760   | GM2A    | GM2 ganglioside activator                               | 3.34  | 4.49.E-03 |
| 120425 | JAML    | junction adhesion molecule like                         | 3.34  | 4.51.E-03 |
| 84885  | ZDHHC12 | zinc finger DHHC-type containing 12                     | 3.34  | 4.52.E-03 |
| 131873 | COL6A6  | collagen type VI alpha 6 chain                          | -3.34 | 4.51.E-03 |
| 1778   | DYNC1H1 | dynein cytoplasmic 1 heavy chain 1                      | 3.34  | 4.51.E-03 |
| 27303  | RBMS3   | RNA binding motif single stranded interacting protein 3 | -3.34 | 4.52.E-03 |
| 6988   | TCTA    | T-cell leukemia translocation altered                   | 3.34  | 4.53.E-03 |
| 112609 | MRAP2   | melanocortin 2 receptor accessory protein 2             | 3.33  | 4.56.E-03 |
| 4851   | NOTCH1  | notch 1                                                 | -3.33 | 4.56.E-03 |
| 25903  | OLFML2B | olfactomedin like 2B                                    | 3.33  | 4.63.E-03 |
| 51181  | DCXR    | dicarbonyl and L-xylulose reductase                     | -3.33 | 4.65.E-03 |
| 22949  | PTGR1   | prostaglandin reductase 1                               | -3.33 | 4.64.E-03 |
| 51027  | BOLA1   | bolA family member 1                                    | -3.33 | 4.66.E-03 |
| 84952  | CGNL1   | cingulin like 1                                         | 3.33  | 4.66.E-03 |
| 10990  | LILRB5  | leukocyte immunoglobulin like receptor B5               | 3.33  | 4.67.E-03 |
| 1149   | CIDEA   | cell death-inducing DFFA-like effector a                | -3.33 | 4.67.E-03 |
| 683    | BST1    | bone marrow stromal cell antigen 1                      | 3.32  | 4.69.E-03 |
| 8835   | SOCS2   | suppressor of cytokine signaling 2                      | -3.32 | 4.69.E-03 |
| 9371   | KIF3B   | kinesin family member 3B                                | 3.32  | 4.69.E-03 |
| 4012   | LNPEP   | leucyl and cystinyl aminopeptidase                      | 3.32  | 4.68.E-03 |
| 9791   | PTDSS1  | phosphatidylserine synthase 1                           | 3.32  | 4.69.E-03 |

|        |          |                                                                              |       |           |
|--------|----------|------------------------------------------------------------------------------|-------|-----------|
| 25911  | DPCD     | deleted in primary ciliary dyskinesia homolog (mouse)                        | 3.32  | 4.70.E-03 |
| 23078  | VWA8     | von Willebrand factor A domain containing 8                                  | -3.32 | 4.73.E-03 |
| 63923  | TNN      | tenascin N                                                                   | -3.32 | 4.77.E-03 |
| 8407   | TAGLN2   | transgelin 2                                                                 | 3.32  | 4.80.E-03 |
| 55240  | STEAP3   | STEAP3 metalloreductase                                                      | 3.32  | 4.81.E-03 |
| 25804  | LSM4     | LSM4 homolog, U6 small nuclear RNA and mRNA degradation associated           | 3.32  | 4.81.E-03 |
| 79007  | DBNDD1   | dysbindin domain containing 1                                                | 3.31  | 4.81.E-03 |
| 23473  | CAPN7    | calpain 7                                                                    | -3.31 | 4.82.E-03 |
| 54931  | TRMT10C  | tRNA methyltransferase 10C, mitochondrial RNase P subunit                    | -3.31 | 4.83.E-03 |
| 2644   | GCHFR    | GTP cyclohydrolase I feedback regulator                                      | -3.31 | 4.86.E-03 |
| 9738   | CCP110   | centriolar coiled-coil protein 110                                           | -3.31 | 4.86.E-03 |
| 113402 | SFT2D1   | SFT2 domain containing 1                                                     | -3.31 | 4.85.E-03 |
| 27163  | NAAA     | N-acylethanolamine acid amidase                                              | 3.31  | 4.85.E-03 |
| 6230   | RPS25    | ribosomal protein S25                                                        | -3.31 | 4.87.E-03 |
| 23408  | SIRT5    | sirtuin 5                                                                    | -3.31 | 4.87.E-03 |
| 26509  | MYOF     | myoferlin                                                                    | 3.31  | 4.89.E-03 |
| 4068   | SH2D1A   | SH2 domain containing 1A                                                     | 3.31  | 4.89.E-03 |
| 9934   | P2RY14   | purinergic receptor P2Y14                                                    | 3.30  | 4.93.E-03 |
| 1725   | DHPS     | deoxyhypusine synthase                                                       | -3.30 | 4.94.E-03 |
| 3570   | IL6R     | interleukin 6 receptor                                                       | 3.30  | 4.95.E-03 |
| 4125   | MAN2B1   | mannosidase alpha class 2B member 1                                          | 3.30  | 4.95.E-03 |
| 3055   | HCK      | HCK proto-oncogene, Src family tyrosine kinase                               | 3.30  | 4.95.E-03 |
| 400451 | FAM174B  | family with sequence similarity 174 member B                                 | 3.30  | 4.97.E-03 |
| 635    | BHMT     | betaine--homocysteine S-methyltransferase                                    | 3.30  | 4.98.E-03 |
| 2054   | STX2     | syntaxin 2                                                                   | 3.30  | 4.99.E-03 |
| 51428  | DDX41    | DEAD-box helicase 41                                                         | 3.30  | 5.00.E-03 |
| 9638   | FEZ1     | fasciculation and elongation protein zeta 1                                  | 3.30  | 5.01.E-03 |
| 4671   | NAIP     | NLR family apoptosis inhibitory protein                                      | 3.30  | 5.01.E-03 |
| 91694  | LONRF1   | LON peptidase N-terminal domain and ring finger 1                            | -3.30 | 5.01.E-03 |
| 1956   | EGFR     | epidermal growth factor receptor                                             | -3.29 | 5.07.E-03 |
| 51085  | MLXIPL   | MLX interacting protein like                                                 | -3.29 | 5.07.E-03 |
| 3257   | HPS1     | HPS1, biogenesis of lysosomal organelles complex 3 subunit 1                 | 3.29  | 5.07.E-03 |
| 5443   | POMC     | proopiomelanocortin                                                          | -3.29 | 5.10.E-03 |
| 123096 | SLC25A29 | solute carrier family 25 member 29                                           | -3.29 | 5.11.E-03 |
| 6688   | SPI1     | Spi-1 proto-oncogene                                                         | 3.29  | 5.10.E-03 |
| 7251   | TSG101   | tumor susceptibility 101                                                     | -3.29 | 5.11.E-03 |
| 80221  | ACSF2    | acyl-CoA synthetase family member 2                                          | -3.29 | 5.11.E-03 |
| 23524  | SRRM2    | serine/arginine repetitive matrix 2                                          | -3.29 | 5.15.E-03 |
| 161742 | SPRED1   | sprouty related EVH1 domain containing 1                                     | 3.29  | 5.14.E-03 |
| 29979  | UBQLN1   | ubiquilin 1                                                                  | -3.29 | 5.17.E-03 |
| 22887  | FOXJ3    | forkhead box J3                                                              | -3.29 | 5.17.E-03 |
| 1611   | DAP      | death associated protein                                                     | 3.29  | 5.17.E-03 |
| 27075  | TSPAN13  | tetraspanin 13                                                               | -3.29 | 5.17.E-03 |
| 5728   | PTEN     | phosphatase and tensin homolog                                               | -3.28 | 5.18.E-03 |
| 2788   | GNG7     | G protein subunit gamma 7                                                    | -3.28 | 5.18.E-03 |
| 3663   | IRF5     | interferon regulatory factor 5                                               | 3.28  | 5.23.E-03 |
| 403340 | MGC70870 | C-terminal binding protein 2 pseudogene                                      | -3.28 | 5.29.E-03 |
| 22919  | MAPRE1   | microtubule associated protein RP/EB family member 1                         | 3.28  | 5.29.E-03 |
| 326624 | RAB37    | RAB37, member RAS oncogene family                                            | 3.28  | 5.29.E-03 |
| 3396   | MRPL58   | mitochondrial ribosomal protein L58                                          | -3.28 | 5.29.E-03 |
| 10212  | DDX39A   | DEAD-box helicase 39A                                                        | 3.28  | 5.33.E-03 |
| 3329   | HSPD1    | heat shock protein family D (Hsp60) member 1                                 | -3.28 | 5.32.E-03 |
| 92014  | SLC25A51 | solute carrier family 25 member 51                                           | -3.28 | 5.33.E-03 |
| 339541 | C1orf228 | chromosome 1 open reading frame 228                                          | 3.27  | 5.35.E-03 |
| 23048  | FNBP1    | formin binding protein 1                                                     | 3.27  | 5.37.E-03 |
| 4283   | CXCL9    | C-X-C motif chemokine ligand 9                                               | 3.27  | 5.37.E-03 |
| 4000   | LMNA     | lamin A/C                                                                    | 3.27  | 5.40.E-03 |
| 57599  | WDR48    | WD repeat domain 48                                                          | -3.27 | 5.42.E-03 |
| 1192   | CLIC1    | chloride intracellular channel 1                                             | 3.27  | 5.44.E-03 |
| 55055  | ZWILCH   | zwilch kinetochore protein                                                   | 3.27  | 5.45.E-03 |
| 8878   | SQSTM1   | sequestosome 1                                                               | 3.27  | 5.45.E-03 |
| 9454   | HOMER3   | homer scaffolding protein 3                                                  | 3.27  | 5.45.E-03 |
| 56731  | SLC2A4RG | SLC2A4 regulator                                                             | -3.26 | 5.46.E-03 |
| 9747   | TCAF1    | TRPM8 channel associated factor 1                                            | -3.26 | 5.46.E-03 |
| 976    | ADGRE5   | adhesion G protein-coupled receptor E5                                       | 3.26  | 5.47.E-03 |
| 9214   | FCMR     | Fc fragment of IgM receptor                                                  | 3.26  | 5.47.E-03 |
| 27109  | ATP5S    | ATP synthase, H+ transporting, mitochondrial Fo complex subunit s (factor B) | -3.26 | 5.50.E-03 |

|        |           |                                                                |       |           |
|--------|-----------|----------------------------------------------------------------|-------|-----------|
| 84102  | SLC41A2   | solute carrier family 41 member 2                              | 3.26  | 5.50.E-03 |
| 6840   | SVIL      | supervillin                                                    | -3.26 | 5.51.E-03 |
| 158293 | FAM120AOS | family with sequence similarity 120A opposite strand           | -3.26 | 5.53.E-03 |
| 3425   | IDUA      | iduronidase, alpha-L-                                          | 3.26  | 5.52.E-03 |
| 168002 | DACT2     | dishevelled binding antagonist of beta catenin 2               | -3.26 | 5.55.E-03 |
| 8975   | USP13     | ubiquitin specific peptidase 13 (isopeptidase T-3)             | -3.26 | 5.55.E-03 |
| 57573  | ZNF471    | zinc finger protein 471                                        | -3.26 | 5.57.E-03 |
| 381    | ARF5      | ADP ribosylation factor 5                                      | 3.26  | 5.56.E-03 |
| 23604  | DAPK2     | death associated protein kinase 2                              | -3.25 | 5.60.E-03 |
| 53829  | P2RY13    | purinergic receptor P2Y13                                      | 3.25  | 5.63.E-03 |
| 10462  | CLEC10A   | C-type lectin domain family 10 member A                        | 3.25  | 5.64.E-03 |
| 55825  | PECR      | peroxisomal trans-2-enoyl-CoA reductase                        | -3.25 | 5.65.E-03 |
| 4924   | NUCB1     | nucleobindin 1                                                 | 3.25  | 5.65.E-03 |
| 151473 | SLC16A14  | solute carrier family 16 member 14                             | -3.25 | 5.72.E-03 |
| 9      | NAT1      | N-acetyltransferase 1                                          | 3.25  | 5.71.E-03 |
| 57446  | NDRG3     | NDRG family member 3                                           | 3.25  | 5.71.E-03 |
| 23225  | NUP210    | nucleoporin 210                                                | 3.25  | 5.71.E-03 |
| 10011  | SRA1      | steroid receptor RNA activator 1                               | 3.25  | 5.71.E-03 |
| 4354   | MPP1      | membrane palmitoylated protein 1                               | 3.25  | 5.72.E-03 |
| 6944   | VPS72     | vacuolar protein sorting 72 homolog                            | -3.25 | 5.74.E-03 |
| 533    | ATP6V0B   | ATPase H+ transporting V0 subunit b                            | 3.25  | 5.73.E-03 |
| 84034  | EMILIN2   | elastin microfibril interfacier 2                              | 3.24  | 5.75.E-03 |
| 1117   | CH13L2    | chitinase 3 like 2                                             | 3.24  | 5.79.E-03 |
| 1025   | CDK9      | cyclin dependent kinase 9                                      | -3.24 | 5.81.E-03 |
| 4916   | NTRK3     | neurotrophic receptor tyrosine kinase 3                        | -3.24 | 5.84.E-03 |
| 221395 | ADGRF5    | adhesion G protein-coupled receptor F5                         | -3.24 | 5.85.E-03 |
| 113802 | HENMT1    | HEN1 methyltransferase homolog 1                               | 3.24  | 5.86.E-03 |
| 79022  | TMEM106C  | transmembrane protein 106C                                     | -3.24 | 5.90.E-03 |
| 5264   | PHYH      | phytanoyl-CoA 2-hydroxylase                                    | -3.23 | 5.96.E-03 |
| 55315  | SLC29A3   | solute carrier family 29 member 3                              | 3.23  | 5.97.E-03 |
| 5711   | PSMD5     | proteasome 26S subunit, non-ATPase 5                           | -3.23 | 5.97.E-03 |
| 64718  | UNKL      | unkempt family like zinc finger                                | 3.23  | 5.98.E-03 |
| 1329   | COX5B     | cytochrome c oxidase subunit 5B                                | -3.23 | 6.08.E-03 |
| 2359   | FPR3      | formyl peptide receptor 3                                      | 3.22  | 6.13.E-03 |
| 404672 | GTF2H5    | general transcription factor IIH subunit 5                     | 3.22  | 6.14.E-03 |
| 54884  | RETSAT    | retinol saturase                                               | 3.22  | 6.14.E-03 |
| 23286  | WWC1      | WW and C2 domain containing 1                                  | 3.22  | 6.13.E-03 |
| 1186   | CLCN7     | chloride voltage-gated channel 7                               | 3.22  | 6.14.E-03 |
| 1318   | SLC31A2   | solute carrier family 31 member 2                              | 3.22  | 6.15.E-03 |
| 10891  | PPARGC1A  | PPARG coactivator 1 alpha                                      | -3.22 | 6.17.E-03 |
| 463    | ZFX3      | zinc finger homeobox 3                                         | 3.22  | 6.17.E-03 |
| 5255   | PHKA1     | phosphorylase kinase regulatory subunit alpha 1                | -3.22 | 6.19.E-03 |
| 23313  | KIAA0930  | KIAA0930                                                       | 3.22  | 6.22.E-03 |
| 10124  | ARL4A     | ADP ribosylation factor like GTPase 4A                         | 3.22  | 6.23.E-03 |
| 115330 | GPR146    | G protein-coupled receptor 146                                 | -3.22 | 6.22.E-03 |
| 7084   | TK2       | thymidine kinase 2, mitochondrial                              | 3.22  | 6.22.E-03 |
| 10131  | TRAP1     | TNF receptor associated protein 1                              | -3.22 | 6.23.E-03 |
| 1856   | DVL2      | dishevelled segment polarity protein 2                         | -3.22 | 6.23.E-03 |
| 7010   | TEK       | TEK receptor tyrosine kinase                                   | -3.22 | 6.23.E-03 |
| 6926   | TBX3      | T-box 3                                                        | -3.21 | 6.24.E-03 |
| 23483  | TGDS      | TDP-glucose 4,6-dehydratase                                    | -3.21 | 6.26.E-03 |
| 10884  | MRPS30    | mitochondrial ribosomal protein S30                            | -3.21 | 6.25.E-03 |
| 8575   | PRKRA     | protein activator of interferon induced protein kinase EIF2AK2 | -3.21 | 6.29.E-03 |
| 473    | RERE      | arginine-glutamic acid dipeptide repeats                       | -3.21 | 6.28.E-03 |
| 55892  | MYNN      | myoneurin                                                      | -3.21 | 6.36.E-03 |
| 80746  | TSEN2     | tRNA splicing endonuclease subunit 2                           | -3.21 | 6.35.E-03 |
| 51311  | TLR8      | toll like receptor 8                                           | 3.21  | 6.35.E-03 |
| 5236   | PGM1      | phosphoglucomutase 1                                           | -3.21 | 6.35.E-03 |
| 3684   | ITGAM     | integrin subunit alpha M                                       | 3.21  | 6.38.E-03 |
| 65005  | MRPL9     | mitochondrial ribosomal protein L9                             | -3.20 | 6.41.E-03 |
| 7409   | VAV1      | vav guanine nucleotide exchange factor 1                       | 3.20  | 6.44.E-03 |
| 51175  | TUBE1     | tubulin epsilon 1                                              | -3.20 | 6.44.E-03 |
| 9267   | CYTH1     | cytohesin 1                                                    | 3.20  | 6.45.E-03 |
| 64222  | TOR3A     | torsin family 3 member A                                       | 3.20  | 6.45.E-03 |
| 10128  | LRPPRC    | leucine rich pentatricopeptide repeat containing               | -3.20 | 6.46.E-03 |
| 80237  | ELL3      | elongation factor for RNA polymerase II 3                      | 3.20  | 6.47.E-03 |
| 64757  | MARC1     | mitochondrial amidoxime reducing component 1                   | -3.20 | 6.50.E-03 |

|        |           |                                                            |       |           |
|--------|-----------|------------------------------------------------------------|-------|-----------|
| 51294  | PCDH12    | protocadherin 12                                           | -3.20 | 6.51.E-03 |
| 1350   | COX7C     | cytochrome c oxidase subunit 7C                            | -3.20 | 6.52.E-03 |
| 4332   | MNDA      | myeloid cell nuclear differentiation antigen               | 3.20  | 6.54.E-03 |
| 55713  | ZNF334    | zinc finger protein 334                                    | -3.20 | 6.58.E-03 |
| 6258   | RXRG      | retinoid X receptor gamma                                  | -3.19 | 6.60.E-03 |
| 6423   | SFRP2     | secreted frizzled related protein 2                        | 3.19  | 6.60.E-03 |
| 79035  | NABP2     | nucleic acid binding protein 2                             | 3.19  | 6.60.E-03 |
| 23629  | BRD7P3    | bromodomain containing 7 pseudogene 3                      | -3.19 | 6.63.E-03 |
| 116362 | RBP7      | retinol binding protein 7                                  | -3.19 | 6.66.E-03 |
| 8334   | HIST1H2AC | histone cluster 1 H2A family member c                      | 3.19  | 6.66.E-03 |
| 1317   | SLC31A1   | solute carrier family 31 member 1                          | 3.19  | 6.69.E-03 |
| 10149  | ADGRG2    | adhesion G protein-coupled receptor G2                     | -3.19 | 6.70.E-03 |
| 23788  | MTCH2     | mitochondrial carrier 2                                    | 3.19  | 6.70.E-03 |
| 55245  | UQCC1     | ubiquinol-cytochrome c reductase complex assembly factor 1 | -3.19 | 6.73.E-03 |
| 80731  | THSD7B    | thrombospondin type 1 domain containing 7B                 | -3.18 | 6.76.E-03 |
| 25886  | POC1A     | POC1 centriolar protein A                                  | 3.18  | 6.76.E-03 |
| 57647  | DHX37     | DEAH-box helicase 37                                       | 3.18  | 6.77.E-03 |
| 9450   | LY86      | lymphocyte antigen 86                                      | 3.18  | 6.77.E-03 |
| 84062  | DTNBP1    | dystrobrevin binding protein 1                             | 3.18  | 6.82.E-03 |
| 4810   | NHS       | NHS actin remodeling regulator                             | -3.18 | 6.82.E-03 |
| 8906   | AP1G2     | adaptor related protein complex 1 gamma 2 subunit          | 3.18  | 6.82.E-03 |
| 50651  | SLC45A1   | solute carrier family 45 member 1                          | -3.18 | 6.94.E-03 |
| 5162   | PDHB      | pyruvate dehydrogenase (lipoamide) beta                    | -3.18 | 6.94.E-03 |
| 5292   | PIM1      | Pim-1 proto-oncogene, serine/threonine kinase              | 3.17  | 6.99.E-03 |
| 4124   | MAN2A1    | mannosidase alpha class 2A member 1                        | 3.17  | 7.00.E-03 |
| 64759  | TNS3      | tensin 3                                                   | 3.17  | 6.99.E-03 |
| 175    | AGA       | aspartylglucosaminidase                                    | 3.17  | 6.99.E-03 |
| 6581   | SLC22A3   | solute carrier family 22 member 3                          | -3.17 | 7.00.E-03 |
| 92999  | ZBTB47    | zinc finger and BTB domain containing 47                   | 3.17  | 7.00.E-03 |
| 65985  | AACS      | acetoacetyl-CoA synthetase                                 | -3.17 | 7.03.E-03 |
| 6821   | SUOX      | sulfite oxidase                                            | -3.17 | 7.02.E-03 |
| 55116  | TMEM39B   | transmembrane protein 39B                                  | 3.16  | 7.14.E-03 |
| 112770 | GLMP      | glycosylated lysosomal membrane protein                    | 3.16  | 7.16.E-03 |
| 57509  | MTUS1     | microtubule associated tumor suppressor 1                  | -3.16 | 7.15.E-03 |
| 54438  | GFOD1     | glucose-fructose oxidoreductase domain containing 1        | -3.16 | 7.16.E-03 |
| 11329  | STK38     | serine/threonine kinase 38                                 | 3.16  | 7.16.E-03 |
| 890    | CCNA2     | cyclin A2                                                  | 3.16  | 7.17.E-03 |
| 2328   | FMO3      | flavin containing monooxygenase 3                          | 3.16  | 7.17.E-03 |
| 526    | ATP6V1B2  | ATPase H+ transporting V1 subunit B2                       | 3.16  | 7.18.E-03 |
| 132158 | GLYCK     | glycerate kinase                                           | -3.16 | 7.18.E-03 |
| 256949 | KANK3     | KN motif and ankyrin repeat domains 3                      | -3.16 | 7.23.E-03 |
| 80321  | CEP70     | centrosomal protein 70                                     | -3.16 | 7.27.E-03 |
| 9601   | PDIA4     | protein disulfide isomerase family A member 4              | 3.16  | 7.27.E-03 |
| 6324   | SCN1B     | sodium voltage-gated channel beta subunit 1                | 3.15  | 7.37.E-03 |
| 64395  | GMCL1     | germ cell-less, spermatogenesis associated 1               | -3.15 | 7.36.E-03 |
| 84245  | MRI1      | methylthioribose-1-phosphate isomerase 1                   | -3.15 | 7.36.E-03 |
| 4129   | MAOB      | monoamine oxidase B                                        | -3.15 | 7.36.E-03 |
| 51765  | STK26     | serine/threonine protein kinase 26                         | -3.15 | 7.36.E-03 |
| 2673   | GFPT1     | glutamine--fructose-6-phosphate transaminase 1             | -3.15 | 7.36.E-03 |
| 114790 | STK11IP   | serine/threonine kinase 11 interacting protein             | 3.15  | 7.35.E-03 |
| 6197   | RPS6KA3   | ribosomal protein S6 kinase A3                             | 3.15  | 7.35.E-03 |
| 286148 | DPY19L4   | dpy-19 like 4 (C. elegans)                                 | -3.15 | 7.46.E-03 |
| 145389 | SLC38A6   | solute carrier family 38 member 6                          | 3.15  | 7.46.E-03 |
| 1495   | CTNNA1    | catenin alpha 1                                            | 3.15  | 7.48.E-03 |
| 7316   | UBC       | ubiquitin C                                                | 3.15  | 7.48.E-03 |
| 9324   | HMGN3     | high mobility group nucleosomal binding domain 3           | -3.15 | 7.48.E-03 |
| 2729   | GCLC      | glutamate-cysteine ligase catalytic subunit                | -3.15 | 7.48.E-03 |
| 7153   | TOP2A     | topoisomerase (DNA) II alpha                               | 3.15  | 7.49.E-03 |
| 1201   | CLN3      | CLN3, battenin                                             | 3.15  | 7.48.E-03 |
| 22822  | PHLDA1    | pleckstrin homology like domain family A member 1          | 3.15  | 7.48.E-03 |
| 22899  | ARHGEF15  | Rho guanine nucleotide exchange factor 15                  | -3.15 | 7.48.E-03 |
| 125476 | INO80C    | INO80 complex subunit C                                    | -3.15 | 7.47.E-03 |
| 23350  | U2SURP    | U2 snRNP associated SURP domain containing                 | -3.14 | 7.51.E-03 |
| 197257 | LDHD      | lactate dehydrogenase D                                    | -3.14 | 7.55.E-03 |
| 137835 | TMEM71    | transmembrane protein 71                                   | 3.14  | 7.60.E-03 |
| 7164   | TPD52L1   | tumor protein D52-like 1                                   | -3.14 | 7.60.E-03 |
| 116447 | TOP1MT    | topoisomerase (DNA) I, mitochondrial                       | 3.14  | 7.61.E-03 |



|        |          |                                                                          |       |           |
|--------|----------|--------------------------------------------------------------------------|-------|-----------|
| 217    | ALDH2    | aldehyde dehydrogenase 2 family (mitochondrial)                          | -3.14 | 7.63.E-03 |
| 313    | AOAH     | acyloxyacyl hydrolase                                                    | 3.14  | 7.65.E-03 |
| 11153  | FICD     | FIC domain containing                                                    | 3.14  | 7.64.E-03 |
| 348094 | ANKDD1A  | ankyrin repeat and death domain containing 1A                            | 3.14  | 7.67.E-03 |
| 79364  | ZXDC     | ZXD family zinc finger C                                                 | -3.14 | 7.68.E-03 |
| 54993  | ZSCAN2   | zinc finger and SCAN domain containing 2                                 | -3.14 | 7.69.E-03 |
| 5350   | PLN      | phospholamban                                                            | -3.13 | 7.73.E-03 |
| 29108  | PYCARD   | PYD and CARD domain containing                                           | 3.13  | 7.74.E-03 |
| 2937   | GSS      | glutathione synthetase                                                   | 3.13  | 7.81.E-03 |
| 1716   | DGUOK    | deoxyguanosine kinase                                                    | -3.13 | 7.81.E-03 |
| 23368  | PPP1R13B | protein phosphatase 1 regulatory subunit 13B                             | -3.13 | 7.86.E-03 |
| 5020   | OXT      | oxytocin/neurophysin I prepropeptide                                     | 3.13  | 7.86.E-03 |
| 6611   | SMS      | spermine synthase                                                        | 3.13  | 7.86.E-03 |
| 23499  | MACF1    | microtubule-actin crosslinking factor 1                                  | 3.13  | 7.92.E-03 |
| 27430  | MAT2B    | methionine adenosyltransferase 2B                                        | -3.13 | 7.92.E-03 |
| 5742   | PTGS1    | prostaglandin-endoperoxide synthase 1                                    | 3.12  | 7.95.E-03 |
| 84988  | PPP1R16A | protein phosphatase 1 regulatory subunit 16A                             | -3.12 | 7.95.E-03 |
| 79161  | TMEM243  | transmembrane protein 243                                                | -3.12 | 7.95.E-03 |
| 286530 | P2RY8    | purinergic receptor P2Y8                                                 | 3.12  | 7.99.E-03 |
| 56995  | TULP4    | tubby like protein 4                                                     | 3.12  | 7.99.E-03 |
| 9367   | RAB9A    | RAB9A, member RAS oncogene family                                        | 3.12  | 8.04.E-03 |
| 3916   | LAMP1    | lysosomal associated membrane protein 1                                  | 3.12  | 8.04.E-03 |
| 6584   | SLC22A5  | solute carrier family 22 member 5                                        | 3.12  | 8.05.E-03 |
| 2268   | FGR      | FGR proto-oncogene, Src family tyrosine kinase                           | 3.12  | 8.05.E-03 |
| 23300  | ATMIN    | ATM interactor                                                           | -3.12 | 8.05.E-03 |
| 51360  | MBTPS2   | membrane bound transcription factor peptidase, site 2                    | -3.12 | 8.05.E-03 |
| 5603   | MAPK13   | mitogen-activated protein kinase 13                                      | 3.12  | 8.05.E-03 |
| 11231  | SEC63    | SEC63 homolog, protein translocation regulator                           | 3.12  | 8.05.E-03 |
| 146894 | CD300LG  | CD300 molecule like family member g                                      | -3.12 | 8.09.E-03 |
| 9950   | GOLGA5   | golgin A5                                                                | 3.11  | 8.12.E-03 |
| 165324 | UBXN2A   | UBX domain protein 2A                                                    | -3.11 | 8.11.E-03 |
| 8884   | SLC5A6   | solute carrier family 5 member 6                                         | -3.11 | 8.15.E-03 |
| 148741 | ANKRD35  | ankyrin repeat domain 35                                                 | 3.11  | 8.18.E-03 |
| 80198  | MUS81    | MUS81 structure-specific endonuclease subunit                            | -3.11 | 8.22.E-03 |
| 3937   | LCP2     | lymphocyte cytosolic protein 2                                           | 3.11  | 8.24.E-03 |
| 4327   | MMP19    | matrix metalloproteinase 19                                              | 3.11  | 8.24.E-03 |
| 221908 | PPP1R35  | protein phosphatase 1 regulatory subunit 35                              | -3.11 | 8.26.E-03 |
| 57414  | RHBDD2   | rhomboid domain containing 2                                             | 3.11  | 8.26.E-03 |
| 761    | CA3      | carbonic anhydrase 3                                                     | -3.11 | 8.26.E-03 |
| 1312   | COMT     | catechol-O-methyltransferase                                             | 3.11  | 8.28.E-03 |
| 29902  | FAM216A  | family with sequence similarity 216 member A                             | 3.11  | 8.30.E-03 |
| 127670 | TEDDM1   | transmembrane epididymal protein 1                                       | -3.11 | 8.30.E-03 |
| 1244   | ABCC2    | ATP binding cassette subfamily C member 2                                | 3.11  | 8.29.E-03 |
| 92002  | FAM58A   | family with sequence similarity 58 member A                              | 3.10  | 8.32.E-03 |
| 51409  | HEMK1    | HemK methyltransferase family member 1                                   | -3.10 | 8.37.E-03 |
| 6993   | DYNLT1   | dynein light chain Tctex-type 1                                          | 3.10  | 8.37.E-03 |
| 57685  | CACHD1   | cache domain containing 1                                                | -3.10 | 8.37.E-03 |
| 10670  | RRAGA    | Ras related GTP binding A                                                | -3.10 | 8.38.E-03 |
| 8402   | SLC25A11 | solute carrier family 25 member 11                                       | -3.10 | 8.37.E-03 |
| 57580  | PREX1    | phosphatidylinositol-3,4,5-trisphosphate dependent Rac exchange factor 1 | 3.10  | 8.39.E-03 |
| 84519  | ACRBP    | acrosin binding protein                                                  | 3.10  | 8.39.E-03 |
| 7057   | THBS1    | thrombospondin 1                                                         | 3.10  | 8.39.E-03 |
| 6041   | RNASEL   | ribonuclease L                                                           | 3.10  | 8.40.E-03 |
| 64960  | MRPS15   | mitochondrial ribosomal protein S15                                      | -3.10 | 8.40.E-03 |
| 8546   | AP3B1    | adaptor related protein complex 3 beta 1 subunit                         | 3.10  | 8.40.E-03 |
| 8428   | STK24    | serine/threonine kinase 24                                               | -3.10 | 8.41.E-03 |
| 9055   | PRC1     | protein regulator of cytokinesis 1                                       | 3.10  | 8.41.E-03 |
| 5176   | SERPINF1 | serpin family F member 1                                                 | 3.10  | 8.41.E-03 |
| 23266  | ADGRL2   | adhesion G protein-coupled receptor L2                                   | -3.10 | 8.43.E-03 |
| 1978   | EIF4EBP1 | eukaryotic translation initiation factor 4E binding protein 1            | -3.10 | 8.43.E-03 |
| 2526   | FUT4     | fucosyltransferase 4                                                     | 3.10  | 8.43.E-03 |
| 6256   | RXRA     | retinoid X receptor alpha                                                | -3.10 | 8.42.E-03 |
| 5701   | PSMC2    | proteasome 26S subunit, ATPase 2                                         | 3.10  | 8.42.E-03 |
| 9509   | ADAMTS2  | ADAM metalloproteinase with thrombospondin type 1 motif 2                | 3.10  | 8.41.E-03 |
| 64425  | POLR1E   | RNA polymerase I subunit E                                               | -3.10 | 8.42.E-03 |
| 1173   | AP2M1    | adaptor related protein complex 2 mu 1 subunit                           | 3.10  | 8.41.E-03 |
| 27152  | INTU     | inturned planar cell polarity protein                                    | -3.09 | 8.47.E-03 |

|        |          |                                                                              |       |           |
|--------|----------|------------------------------------------------------------------------------|-------|-----------|
| 5101   | PCDH9    | protocadherin 9                                                              | 3.09  | 8.52.E-03 |
| 3315   | HSPB1    | heat shock protein family B (small) member 1                                 | 3.09  | 8.52.E-03 |
| 283638 | CEP170B  | centrosomal protein 170B                                                     | 3.09  | 8.52.E-03 |
| 6141   | RPL18    | ribosomal protein L18                                                        | -3.09 | 8.52.E-03 |
| 84148  | KAT8     | lysine acetyltransferase 8                                                   | -3.09 | 8.55.E-03 |
| 23005  | MAPKBP1  | mitogen-activated protein kinase binding protein 1                           | 3.09  | 8.58.E-03 |
| 83543  | AIF1L    | allograft inflammatory factor 1 like                                         | -3.09 | 8.58.E-03 |
| 221472 | FGD2     | FYVE, RhoGEF and PH domain containing 2                                      | 3.09  | 8.59.E-03 |
| 845    | CASQ2    | calsequestrin 2                                                              | -3.09 | 8.63.E-03 |
| 118424 | UBE2J2   | ubiquitin conjugating enzyme E2 J2                                           | -3.09 | 8.63.E-03 |
| 23012  | STK38L   | serine/threonine kinase 38 like                                              | 3.09  | 8.63.E-03 |
| 1164   | CKS2     | CDC28 protein kinase regulatory subunit 2                                    | 3.09  | 8.64.E-03 |
| 60487  | TRMT11   | tRNA methyltransferase 11 homolog                                            | -3.09 | 8.65.E-03 |
| 11137  | PWP1     | PWP1 homolog, endonuclein                                                    | 3.09  | 8.66.E-03 |
| 2202   | EFEMP1   | EGF containing fibulin like extracellular matrix protein 1                   | 3.08  | 8.70.E-03 |
| 90390  | MED30    | mediator complex subunit 30                                                  | -3.08 | 8.72.E-03 |
| 1983   | EIF5     | eukaryotic translation initiation factor 5                                   | -3.08 | 8.73.E-03 |
| 79607  | FAM118B  | family with sequence similarity 118 member B                                 | 3.08  | 8.74.E-03 |
| 1777   | DNASE2   | deoxyribonuclease 2, lysosomal                                               | 3.08  | 8.75.E-03 |
| 56910  | STAR7    | StAR related lipid transfer domain containing 7                              | 3.08  | 8.77.E-03 |
| 5050   | PAFAH1B3 | platelet activating factor acetylhydrolase 1b catalytic subunit 3            | 3.08  | 8.77.E-03 |
| 5638   | PRRG1    | proline rich and Gla domain 1                                                | 3.08  | 8.78.E-03 |
| 23731  | TMEM245  | transmembrane protein 245                                                    | -3.08 | 8.81.E-03 |
| 29785  | CYP2S1   | cytochrome P450 family 2 subfamily S member 1                                | 3.08  | 8.86.E-03 |
| 821    | CANX     | calnexin                                                                     | 3.07  | 9.01.E-03 |
| 55208  | DCUN1D2  | defective in cullin neddylation 1 domain containing 2                        | -3.07 | 9.06.E-03 |
| 119504 | ANAPC16  | anaphase promoting complex subunit 16                                        | -3.07 | 9.06.E-03 |
| 509    | ATP5C1   | ATP synthase, H+ transporting, mitochondrial F1 complex, gamma polypeptide 1 | -3.07 | 9.06.E-03 |
| 5207   | PFKFB1   | 6-phosphofructo-2-kinase/fructose-2,6-biphosphatase 1                        | -3.07 | 9.05.E-03 |
| 5002   | SLC22A18 | solute carrier family 22 member 18                                           | 3.07  | 9.05.E-03 |
| 6786   | STIM1    | stromal interaction molecule 1                                               | 3.07  | 9.07.E-03 |
| 771    | CA12     | carbonic anhydrase 12                                                        | 3.07  | 9.07.E-03 |
| 338382 | RAB7B    | RAB7B, member RAS oncogene family                                            | 3.06  | 9.23.E-03 |
| 4889   | NPY5R    | neuropeptide Y receptor Y5                                                   | 3.06  | 9.24.E-03 |
| 5140   | PDE3B    | phosphodiesterase 3B                                                         | -3.06 | 9.29.E-03 |
| 9563   | H6PD     | hexose-6-phosphate dehydrogenase/glucose 1-dehydrogenase                     | 3.06  | 9.31.E-03 |
| 55268  | ECHDC2   | enoyl-CoA hydratase domain containing 2                                      | -3.06 | 9.30.E-03 |
| 56984  | PSMG2    | proteasome assembly chaperone 2                                              | -3.06 | 9.31.E-03 |
| 29929  | ALG6     | ALG6, alpha-1,3-glucosyltransferase                                          | 3.06  | 9.34.E-03 |
| 55074  | OXR1     | oxidation resistance 1                                                       | -3.06 | 9.38.E-03 |
| 80324  | PUS1     | pseudouridylylase synthase 1                                                 | 3.06  | 9.39.E-03 |
| 285527 | FRYL     | FRY like transcription coactivator                                           | -3.06 | 9.39.E-03 |
| 8076   | MFAP5    | microfibrillar associated protein 5                                          | 3.06  | 9.39.E-03 |
| 79981  | FRMD1    | FERM domain containing 1                                                     | -3.06 | 9.41.E-03 |
| 7791   | ZYX      | zyxin                                                                        | 3.06  | 9.44.E-03 |
| 57184  | FAM219B  | family with sequence similarity 219 member B                                 | -3.06 | 9.45.E-03 |
| 3927   | LASP1    | LIM and SH3 protein 1                                                        | 3.06  | 9.44.E-03 |
| 10113  | PREB     | prolactin regulatory element binding                                         | 3.05  | 9.47.E-03 |
| 5446   | PON3     | paraoxonase 3                                                                | -3.05 | 9.50.E-03 |
| 3838   | KPNA2    | karyopherin subunit alpha 2                                                  | 3.05  | 9.54.E-03 |
| 10457  | GPNMB    | glycoprotein nmb                                                             | 3.05  | 9.55.E-03 |
| 23643  | LY96     | lymphocyte antigen 96                                                        | 3.05  | 9.54.E-03 |
| 26512  | INTS6    | integrator complex subunit 6                                                 | -3.05 | 9.65.E-03 |
| 23646  | PLD3     | phospholipase D family member 3                                              | 3.05  | 9.66.E-03 |
| 26018  | LRIG1    | leucine rich repeats and immunoglobulin like domains 1                       | -3.05 | 9.66.E-03 |
| 6201   | RPS7     | ribosomal protein S7                                                         | -3.05 | 9.67.E-03 |
| 83541  | FAM110A  | family with sequence similarity 110 member A                                 | 3.05  | 9.69.E-03 |
| 55621  | TRMT1    | tRNA methyltransferase 1                                                     | 3.05  | 9.69.E-03 |
| 115677 | NOSTRIN  | nitric oxide synthase trafficking                                            | -3.04 | 9.69.E-03 |
| 956    | ENTPD3   | ectonucleoside triphosphate diphosphohydrolase 3                             | -3.04 | 9.69.E-03 |
| 54948  | MRPL16   | mitochondrial ribosomal protein L16                                          | -3.04 | 9.69.E-03 |
| 56963  | RGMA     | repulsive guidance molecule family member a                                  | -3.04 | 9.71.E-03 |
| 285172 | FAM126B  | family with sequence similarity 126 member B                                 | -3.04 | 9.72.E-03 |
| 55010  | PARBP    | PARP1 binding protein                                                        | 3.04  | 9.71.E-03 |
| 2271   | FH       | fumarate hydratase                                                           | -3.04 | 9.77.E-03 |
| 51135  | IRAK4    | interleukin 1 receptor associated kinase 4                                   | 3.04  | 9.79.E-03 |
| 7169   | TPM2     | tropomyosin 2 (beta)                                                         | 3.04  | 9.79.E-03 |

|        |         |                                                                                  |       |           |
|--------|---------|----------------------------------------------------------------------------------|-------|-----------|
| 6300   | MAPK12  | mitogen-activated protein kinase 12                                              | -3.04 | 9.82.E-03 |
| 2055   | CLN8    | ceroid-lipofuscinosis, neuronal 8                                                | 3.04  | 9.81.E-03 |
| 391    | RHOG    | ras homolog family member G                                                      | 3.04  | 9.88.E-03 |
| 9659   | PDE4DIP | phosphodiesterase 4D interacting protein                                         | 3.04  | 9.89.E-03 |
| 338328 | GPIHBP1 | glycosylphosphatidylinositol anchored high density lipoprotein binding protein 1 | -3.04 | 9.91.E-03 |
| 3759   | KCNJ2   | potassium voltage-gated channel subfamily J member 2                             | 3.03  | 9.93.E-03 |
| 51604  | PIGT    | phosphatidylinositol glycan anchor biosynthesis class T                          | 3.03  | 9.96.E-03 |
| 27034  | ACAD8   | acyl-CoA dehydrogenase family member 8                                           | -3.03 | 9.99.E-03 |

Table S2. The identified cross-species drug-signatures.

| Gene id | Symbol   | Gene name                                                                                   | Z-score | FDR       |
|---------|----------|---------------------------------------------------------------------------------------------|---------|-----------|
| 8870    | IER3     | immediate early response 3                                                                  | 7.33    | 0.00.E+00 |
| 1979    | EIF4EBP2 | eukaryotic translation initiation factor 4E binding protein 2                               | -7.18   | 0.00.E+00 |
| 11043   | MID2     | midline 2                                                                                   | -6.99   | 0.00.E+00 |
| 56301   | SLC7A10  | solute carrier family 7 (neutral amino acid transporter light chain, asc system), member 10 | -6.78   | 0.00.E+00 |
| 4337    | MOCS1    | molybdenum cofactor synthesis 1                                                             | -6.70   | 0.00.E+00 |
| 25975   | EGFL6    | EGF-like-domain, multiple 6                                                                 | 6.58    | 0.00.E+00 |
| 3952    | LEP      | leptin                                                                                      | 6.49    | 0.00.E+00 |
| 64756   | ATPAF1   | ATP synthase mitochondrial F1 complex assembly factor 1                                     | -6.38   | 0.00.E+00 |
| 3929    | LBP      | lipopolysaccharide binding protein                                                          | 6.11    | 0.00.E+00 |
| 2650    | GCNT1    | glucosaminyl (N-acetyl) transferase 1, core 2                                               | 6.07    | 0.00.E+00 |
| 5216    | PFN1     | profilin 1                                                                                  | 6.03    | 0.00.E+00 |
| 9051    | PSTPIP1  | proline-serine-threonine phosphatase interacting protein 1                                  | 5.81    | 0.00.E+00 |
| 3791    | KDR      | kinase insert domain receptor                                                               | -5.63   | 0.00.E+00 |
| 1959    | EGR2     | early growth response 2                                                                     | 5.62    | 0.00.E+00 |
| 595     | CCND1    | cyclin D1                                                                                   | 5.36    | 0.00.E+00 |
| 83943   | IMMP2L   | inner mitochondrial membrane peptidase subunit 2                                            | -5.35   | 0.00.E+00 |
| 6271    | S100A1   | S100 calcium binding protein A1                                                             | -5.33   | 0.00.E+00 |
| 7481    | WNT11    | wingless-type MMTV integration site family, member 11                                       | -5.31   | 0.00.E+00 |
| 2872    | MKNK2    | MAP kinase interacting serine/threonine kinase 2                                            | -5.31   | 0.00.E+00 |
| 6275    | S100A4   | S100 calcium binding protein A4                                                             | 5.30    | 0.00.E+00 |
| 153579  | BTNL9    | butyrophilin-like 9                                                                         | -5.25   | 7.94.E-06 |
| 4329    | ALDH6A1  | aldehyde dehydrogenase 6 family, member A1                                                  | -5.23   | 7.87.E-06 |
| 28999   | KLF15    | Kruppel-like factor 15                                                                      | -5.23   | 7.81.E-06 |
| 594     | BCKDHB   | branched chain keto acid dehydrogenase E1, beta polypeptide                                 | -5.18   | 7.46.E-06 |
| 5827    | PXMP2    | peroxisomal membrane protein 2, 22kDa                                                       | -5.11   | 1.40.E-05 |
| 7941    | PLA2G7   | phospholipase A2, group VII (platelet-activating factor acetylhydrolase, plasma)            | 5.02    | 1.27.E-05 |
| 1528    | CYB5A    | cytochrome b5 type A (microsomal)                                                           | -4.90   | 4.84.E-05 |
| 5973    | RENBP    | renin binding protein                                                                       | 4.89    | 5.18.E-05 |
| 10170   | DHRS9    | dehydrogenase/reductase (SDR family) member 9                                               | 4.88    | 5.15.E-05 |
| 57520   | HECW2    | HECT, C2 and WW domain containing E3 ubiquitin protein ligase 2                             | -4.82   | 7.62.E-05 |
| 2769    | GNA15    | guanine nucleotide binding protein (G protein), alpha 15 (Gq class)                         | 4.82    | 7.58.E-05 |
| 219855  | SLC37A2  | solute carrier family 37 (glucose-6-phosphate transporter), member 2                        | 4.81    | 8.02.E-05 |
| 84706   | GPT2     | glutamic pyruvate transaminase (alanine aminotransferase) 2                                 | -4.80   | 7.87.E-05 |
| 5027    | P2RX7    | purinergic receptor P2X, ligand gated ion channel, 7                                        | 4.78    | 8.29.E-05 |
| 8800    | PEX11A   | peroxisomal biogenesis factor 11 alpha                                                      | -4.77   | 8.14.E-05 |
| 38      | ACAT1    | acetyl-CoA acetyltransferase 1                                                              | -4.77   | 8.11.E-05 |
| 23175   | LPIN1    | lipin 1                                                                                     | -4.75   | 9.21.E-05 |
| 5164    | PDK2     | pyruvate dehydrogenase kinase, isozyme 2                                                    | -4.75   | 9.17.E-05 |
| 9710    | KIAA0355 | KIAA0355                                                                                    | -4.74   | 9.09.E-05 |
| 1476    | CSTB     | cystatin B (stefin B)                                                                       | 4.74    | 9.44.E-05 |
| 5660    | PSAP     | prosaposin                                                                                  | 4.74    | 9.40.E-05 |
| 80727   | TTYH3    | tweety family member 3                                                                      | 4.73    | 1.05.E-04 |
| 4131    | MAP1B    | microtubule-associated protein 1B                                                           | 4.67    | 1.38.E-04 |
| 713     | C1QB     | complement component 1, q subcomponent, B chain                                             | 4.67    | 1.48.E-04 |
| 56833   | SLAMF8   | SLAM family member 8                                                                        | 4.66    | 1.46.E-04 |
| 4015    | LOX      | lysyl oxidase                                                                               | 4.65    | 1.47.E-04 |
| 56922   | MCCC1    | methylcrotonoyl-CoA carboxylase 1 (alpha)                                                   | -4.63   | 1.50.E-04 |
| 5209    | PFKFB3   | 6-phosphofructo-2-kinase/fructose-2,6-biphosphatase 3                                       | -4.59   | 1.68.E-04 |
| 28514   | DLL1     | delta-like 1 (Drosophila)                                                                   | -4.54   | 1.82.E-04 |
| 11326   | VSIG4    | V-set and immunoglobulin domain containing 4                                                | 4.52    | 1.79.E-04 |
| 714     | C1QC     | complement component 1, q subcomponent, C chain                                             | 4.51    | 1.90.E-04 |
| 12      | SERPINA3 | serpin peptidase inhibitor, clade A (alpha-1 antiproteinase, antitrypsin), member 3         | 4.50    | 1.88.E-04 |
| 5179    | PENK     | proenkephalin                                                                               | 4.47    | 1.96.E-04 |
| 84263   | HSDL2    | hydroxysteroid dehydrogenase like 2                                                         | -4.44   | 2.13.E-04 |
| 2331    | FMOD     | fibromodulin                                                                                | 4.43    | 2.12.E-04 |
| 5025    | P2RX4    | purinergic receptor P2X, ligand gated ion channel, 4                                        | 4.41    | 2.22.E-04 |
| 4481    | MSR1     | macrophage scavenger receptor 1                                                             | 4.41    | 2.25.E-04 |
| 6850    | SYK      | spleen tyrosine kinase                                                                      | 4.40    | 2.25.E-04 |
| 55526   | DHTKD1   | dehydrogenase E1 and transketolase domain containing 1                                      | -4.39   | 2.25.E-04 |
| 5360    | PLTP     | phospholipid transfer protein                                                               | 4.38    | 2.31.E-04 |
| 1436    | CSF1R    | colony stimulating factor 1 receptor                                                        | 4.36    | 2.43.E-04 |
| 56243   | KIAA1217 | KIAA1217                                                                                    | -4.33   | 2.76.E-04 |
| 137872  | ADHFE1   | alcohol dehydrogenase, iron containing, 1                                                   | -4.30   | 2.98.E-04 |
| 2717    | GLA      | galactosidase, alpha                                                                        | 4.30    | 3.11.E-04 |
| 26227   | PHGDH    | phosphoglycerate dehydrogenase                                                              | -4.25   | 3.39.E-04 |
| 64231   | MS4A6A   | membrane-spanning 4-domains, subfamily A, member 6A                                         | 4.24    | 3.41.E-04 |
| 1031    | CDKN2C   | cyclin-dependent kinase inhibitor 2C (p18, inhibits CDK4)                                   | -4.23   | 3.66.E-04 |

|        |          |                                                                                         |       |           |
|--------|----------|-----------------------------------------------------------------------------------------|-------|-----------|
| 10261  | IGSF6    | immunoglobulin superfamily, member 6                                                    | 4.22  | 3.79.E-04 |
| 3074   | HEXB     | hexosaminidase B (beta polypeptide)                                                     | 4.21  | 4.00.E-04 |
| 929    | CD14     | CD14 molecule                                                                           | 4.20  | 4.06.E-04 |
| 712    | C1QA     | complement component 1, q subcomponent, A chain                                         | 4.20  | 4.11.E-04 |
| 55200  | PLEKHG6  | pleckstrin homology domain containing, family G (with RhoGef domain) member 6           | -4.20 | 4.10.E-04 |
| 3101   | HK3      | hexokinase 3 (white cell)                                                               | 4.18  | 4.10.E-04 |
| 822    | CAPG     | capping protein (actin filament), gelsolin-like                                         | 4.18  | 4.16.E-04 |
| 10243  | GPHN     | gephyrin                                                                                | -4.16 | 4.30.E-04 |
| 80896  | NPL      | N-acetylneuraminatase pyruvate lyase (dihydrodipicolinate synthase)                     | 4.16  | 4.30.E-04 |
| 719    | C3AR1    | complement component 3a receptor 1                                                      | 4.14  | 4.45.E-04 |
| 8877   | SPHK1    | sphingosine kinase 1                                                                    | 4.14  | 4.46.E-04 |
| 29127  | RACGAP1  | Rac GTPase activating protein 1                                                         | 4.14  | 4.51.E-04 |
| 9056   | SLC7A7   | solute carrier family 7 (amino acid transporter light chain, y+L system), member 7      | 4.12  | 4.61.E-04 |
| 58191  | CXCL16   | chemokine (C-X-C motif) ligand 16                                                       | 4.12  | 4.60.E-04 |
| 3001   | GZMA     | granzyme A (granzyme 1, cytotoxic T-lymphocyte-associated serine esterase 3)            | 4.11  | 4.63.E-04 |
| 51296  | SLC15A3  | solute carrier family 15 (oligopeptide transporter), member 3                           | 4.07  | 5.16.E-04 |
| 55013  | CCDC109B | coiled-coil domain containing 109B                                                      | 4.07  | 5.22.E-04 |
| 3162   | HMOX1    | heme oxygenase 1                                                                        | 4.06  | 5.33.E-04 |
| 4316   | MMP7     | matrix metalloproteinase 7                                                              | 4.06  | 5.37.E-04 |
| 5341   | PLEK     | pleckstrin                                                                              | 4.04  | 5.76.E-04 |
| 10287  | RGS19    | regulator of G-protein signaling 19                                                     | 4.04  | 5.95.E-04 |
| 143503 | OR51E1   | olfactory receptor, family 51, subfamily E, member 1                                    | -4.03 | 6.01.E-04 |
| 54675  | CRLS1    | cardiolipin synthase 1                                                                  | -4.03 | 6.14.E-04 |
| 10491  | CRTAP    | cartilage associated protein                                                            | 4.02  | 6.29.E-04 |
| 29887  | SNX10    | sorting nexin 10                                                                        | 3.99  | 7.09.E-04 |
| 4126   | MANBA    | mannosidase, beta A, lysosomal                                                          | 3.98  | 7.23.E-04 |
| 2207   | FCER1G   | Fc fragment of IgE, high affinity 1, receptor for; gamma polypeptide                    | 3.98  | 7.24.E-04 |
| 5777   | PTPN6    | protein tyrosine phosphatase, non-receptor type 6                                       | 3.96  | 7.53.E-04 |
| 6696   | SPP1     | secreted phosphoprotein 1                                                               | 3.96  | 7.53.E-04 |
| 283431 | GAS2L3   | growth arrest-specific 2 like 3                                                         | 3.95  | 7.56.E-04 |
| 9046   | DOK2     | docking protein 2, 56kDa                                                                | 3.95  | 7.76.E-04 |
| 2896   | GRN      | granulin                                                                                | 3.94  | 7.95.E-04 |
| 113    | ADCY7    | adenylate cyclase 7                                                                     | 3.94  | 8.00.E-04 |
| 3357   | HTR2B    | 5-hydroxytryptamine (serotonin) receptor 2B, G protein-coupled                          | 3.92  | 8.24.E-04 |
| 8673   | VAMP8    | vesicle-associated membrane protein 8                                                   | 3.91  | 8.61.E-04 |
| 7305   | TYROBP   | TYRO protein tyrosine kinase binding protein                                            | 3.90  | 8.79.E-04 |
| 32     | ACACB    | acetyl-CoA carboxylase beta                                                             | -3.89 | 8.93.E-04 |
| 64174  | DPEP2    | dipeptidase 2                                                                           | 3.89  | 8.98.E-04 |
| 3071   | NCKAP1L  | NCK-associated protein 1-like                                                           | 3.89  | 9.02.E-04 |
| 79085  | SLC25A23 | solute carrier family 25 (mitochondrial carrier; phosphate carrier), member 23          | -3.88 | 9.33.E-04 |
| 5329   | PLAUR    | plasminogen activator, urokinase receptor                                               | 3.88  | 9.44.E-04 |
| 80704  | SLC19A3  | solute carrier family 19 (thiamine transporter), member 3                               | -3.87 | 9.59.E-04 |
| 8476   | CDC42BPA | CDC42 binding protein kinase alpha (DMPK-like)                                          | -3.87 | 9.84.E-04 |
| 3059   | HCLS1    | hematopoietic cell-specific Lyn substrate 1                                             | 3.85  | 1.03.E-03 |
| 23406  | COTL1    | coactosin-like F-actin binding protein 1                                                | 3.83  | 1.11.E-03 |
| 53834  | FGFRL1   | fibroblast growth factor receptor-like 1                                                | -3.81 | 1.17.E-03 |
| 1203   | CLN5     | ceroid-lipofuscinosis, neuronal 5                                                       | 3.80  | 1.21.E-03 |
| 10653  | SPINT2   | serine peptidase inhibitor, Kunitz type, 2                                              | 3.78  | 1.32.E-03 |
| 3912   | LAMB1    | laminin, beta 1                                                                         | -3.78 | 1.33.E-03 |
| 5641   | LGMN     | legumain                                                                                | 3.78  | 1.34.E-03 |
| 89846  | FGD3     | FYVE, RhoGEF and PH domain containing 3                                                 | 3.77  | 1.35.E-03 |
| 8460   | TPST1    | tyrosylprotein sulfotransferase 1                                                       | -3.76 | 1.43.E-03 |
| 7533   | YWHAH    | tyrosine 3-monooxygenase/tryptophan 5-monooxygenase activation protein, eta             | 3.73  | 1.52.E-03 |
| 130399 | ACVR1C   | activin A receptor, type IC                                                             | -3.73 | 1.52.E-03 |
| 6352   | CCL5     | chemokine (C-C motif) ligand 5                                                          | 3.71  | 1.61.E-03 |
| 9334   | B4GALT5  | UDP-Gal:betaGlcNAc beta 1,4- galactosyltransferase, polypeptide 5                       | 3.71  | 1.61.E-03 |
| 2246   | FGF1     | fibroblast growth factor 1 (acidic)                                                     | 3.71  | 1.62.E-03 |
| 9308   | CD83     | CD83 molecule                                                                           | 3.70  | 1.68.E-03 |
| 10870  | HCST     | hematopoietic cell signal transducer                                                    | 3.67  | 1.79.E-03 |
| 51284  | TLR7     | toll-like receptor 7                                                                    | 3.65  | 1.88.E-03 |
| 23462  | HEY1     | hes-related family bHLH transcription factor with YRPW motif 1                          | -3.65 | 1.87.E-03 |
| 5880   | RAC2     | ras-related C3 botulinum toxin substrate 2 (rho family, small GTP binding protein Rac2) | 3.64  | 1.96.E-03 |
| 23743  | BHMT2    | betaine--homocysteine S-methyltransferase 2                                             | 3.63  | 1.99.E-03 |
| 2519   | FUCA2    | fucosidase, alpha-L- 2, plasma                                                          | 3.62  | 2.07.E-03 |
| 695    | BTK      | Bruton agammaglobulinemia tyrosine kinase                                               | 3.62  | 2.08.E-03 |
| 83442  | SH3BGLR3 | SH3 domain binding glutamate-rich protein like 3                                        | 3.60  | 2.18.E-03 |
| 586    | BCAT1    | branched chain amino-acid transaminase 1, cytosolic                                     | 3.57  | 2.32.E-03 |
| 4689   | NCF4     | neutrophil cytosolic factor 4, 40kDa                                                    | 3.57  | 2.37.E-03 |
| 1043   | CD52     | CD52 molecule                                                                           | 3.55  | 2.52.E-03 |

|        |          |                                                                                  |       |           |
|--------|----------|----------------------------------------------------------------------------------|-------|-----------|
| 7852   | CXCR4    | chemokine (C-X-C motif) receptor 4                                               | 3.54  | 2.62.E-03 |
| 54491  | FAM105A  | family with sequence similarity 105, member A                                    | 3.53  | 2.67.E-03 |
| 4239   | MFAP4    | microfibrillar-associated protein 4                                              | 3.52  | 2.78.E-03 |
| 366    | AQP9     | aquaporin 9                                                                      | 3.52  | 2.79.E-03 |
| 4256   | MGP      | matrix Gla protein                                                               | 3.51  | 2.84.E-03 |
| 7805   | LAPTM5   | lysosomal protein transmembrane 5                                                | 3.50  | 2.87.E-03 |
| 3099   | HK2      | hexokinase 2                                                                     | -3.50 | 2.88.E-03 |
| 64333  | ARHGAP9  | Rho GTPase activating protein 9                                                  | 3.48  | 3.11.E-03 |
| 728    | C5AR1    | complement component 5a receptor 1                                               | 3.46  | 3.23.E-03 |
| 8165   | AKAP1    | A kinase (PRKA) anchor protein 1                                                 | -3.46 | 3.24.E-03 |
| 9124   | PDLIM1   | PDZ and LIM domain 1                                                             | 3.46  | 3.26.E-03 |
| 64641  | EBF2     | early B-cell factor 2                                                            | -3.45 | 3.38.E-03 |
| 9935   | MAFB     | v-maf avian musculoaponeurotic fibrosarcoma oncogene homolog B                   | 3.44  | 3.47.E-03 |
| 51338  | MS4A4A   | membrane-spanning 4-domains, subfamily A, member 4A                              | 3.42  | 3.65.E-03 |
| 11112  | HIBADH   | 3-hydroxyisobutyrate dehydrogenase                                               | -3.41 | 3.75.E-03 |
| 9770   | RASSF2   | Ras association (RalGDS/AF-6) domain family member 2                             | 3.41  | 3.75.E-03 |
| 1629   | DBT      | dihydrolipoamide branched chain transacylase E2                                  | -3.41 | 3.76.E-03 |
| 126364 | LRRC25   | leucine rich repeat containing 25                                                | 3.37  | 4.17.E-03 |
| 3643   | INSR     | insulin receptor                                                                 | -3.37 | 4.17.E-03 |
| 1520   | CTSS     | cathepsin S                                                                      | 3.36  | 4.24.E-03 |
| 5096   | PCCB     | propionyl CoA carboxylase, beta polypeptide                                      | -3.36 | 4.26.E-03 |
| 26031  | OSBPL3   | oxysterol binding protein-like 3                                                 | 3.35  | 4.39.E-03 |
| 219972 | MPEG1    | macrophage expressed 1                                                           | 3.35  | 4.40.E-03 |
| 683    | BST1     | bone marrow stromal cell antigen 1                                               | 3.32  | 4.69.E-03 |
| 9791   | PTDSS1   | phosphatidylserine synthase 1                                                    | 3.32  | 4.69.E-03 |
| 9934   | P2RY14   | purinergic receptor P2Y, G-protein coupled, 14                                   | 3.30  | 4.93.E-03 |
| 4125   | MAN2B1   | mannosidase, alpha, class 2B, member 1                                           | 3.30  | 4.95.E-03 |
| 51085  | MLXIPL   | MLX interacting protein-like                                                     | -3.29 | 5.07.E-03 |
| 6688   | SPI1     | Spi-1 proto-oncogene                                                             | 3.29  | 5.10.E-03 |
| 27075  | TSPAN13  | tetraspanin 13                                                                   | -3.29 | 5.17.E-03 |
| 5728   | PTEN     | phosphatase and tensin homolog                                                   | -3.28 | 5.18.E-03 |
| 1192   | CLIC1    | chloride intracellular channel 1                                                 | 3.27  | 5.44.E-03 |
| 4354   | MPP1     | membrane protein, palmitoylated 1, 55kDa                                         | 3.25  | 5.72.E-03 |
| 533    | ATP6VOB  | ATPase, H+ transporting, lysosomal 21kDa, V0 subunit b                           | 3.25  | 5.73.E-03 |
| 4916   | NTRK3    | neurotrophic tyrosine kinase, receptor, type 3                                   | -3.24 | 5.84.E-03 |
| 5264   | PHYH     | phytanoyl-CoA 2-hydroxylase                                                      | -3.23 | 5.96.E-03 |
| 115330 | GPR146   | G protein-coupled receptor 146                                                   | -3.22 | 6.22.E-03 |
| 6926   | TBX3     | T-box 3                                                                          | -3.21 | 6.24.E-03 |
| 473    | RERE     | arginine-glutamic acid dipeptide (RE) repeats                                    | -3.21 | 6.28.E-03 |
| 51311  | TLR8     | toll-like receptor 8                                                             | 3.21  | 6.35.E-03 |
| 7409   | VAV1     | vav 1 guanine nucleotide exchange factor                                         | 3.20  | 6.44.E-03 |
| 6258   | RXRG     | retinoid X receptor, gamma                                                       | -3.19 | 6.60.E-03 |
| 116362 | RBP7     | retinol binding protein 7, cellular                                              | -3.19 | 6.66.E-03 |
| 6581   | SLC22A3  | solute carrier family 22 (organic cation transporter), member 3                  | -3.17 | 7.00.E-03 |
| 890    | CCNA2    | cyclin A2                                                                        | 3.16  | 7.17.E-03 |
| 2328   | FMO3     | flavin containing monooxygenase 3                                                | 3.16  | 7.17.E-03 |
| 526    | ATP6V1B2 | ATPase, H+ transporting, lysosomal 56/58kDa, V1 subunit B2                       | 3.16  | 7.18.E-03 |
| 4129   | MAOB     | monoamine oxidase B                                                              | -3.15 | 7.36.E-03 |
| 1201   | CLN3     | ceroid-lipofuscinosis, neuronal 3                                                | 3.15  | 7.48.E-03 |
| 22899  | ARHGEF15 | Rho guanine nucleotide exchange factor (GEF) 15                                  | -3.15 | 7.48.E-03 |
| 29108  | PYCARD   | PYD and CARD domain containing                                                   | 3.13  | 7.74.E-03 |
| 23368  | PPP1R13B | protein phosphatase 1, regulatory subunit 13B                                    | -3.13 | 7.86.E-03 |
| 84988  | PPP1R16A | protein phosphatase 1, regulatory subunit 16A                                    | -3.12 | 7.95.E-03 |
| 2268   | FGR      | FGR proto-oncogene, Src family tyrosine kinase                                   | 3.12  | 8.05.E-03 |
| 146894 | CD300LG  | CD300 molecule-like family member g                                              | -3.12 | 8.09.E-03 |
| 8884   | SLC5A6   | solute carrier family 5 (sodium/multivitamin and iodide cotransporter), member 6 | -3.11 | 8.15.E-03 |
| 761    | CA3      | carbonic anhydrase III                                                           | -3.11 | 8.26.E-03 |
| 57685  | CACHD1   | cache domain containing 1                                                        | -3.10 | 8.37.E-03 |
| 64960  | MRPS15   | mitochondrial ribosomal protein S15                                              | -3.10 | 8.40.E-03 |
| 9055   | PRC1     | protein regulator of cytokinesis 1                                               | 3.10  | 8.41.E-03 |
| 1978   | EIF4EBP1 | eukaryotic translation initiation factor 4E binding protein 1                    | -3.10 | 8.43.E-03 |
| 6256   | RXRA     | retinoid X receptor, alpha                                                       | -3.10 | 8.42.E-03 |
| 1173   | AP2M1    | adaptor-related protein complex 2, mu 1 subunit                                  | 3.10  | 8.41.E-03 |
| 1164   | CKS2     | CDC28 protein kinase regulatory subunit 2                                        | 3.09  | 8.64.E-03 |
| 5207   | PFKFB1   | 6-phosphofructo-2-kinase/fructose-2,6-biphosphatase 1                            | -3.07 | 9.05.E-03 |
| 5140   | PDE3B    | phosphodiesterase 3B, cGMP-inhibited                                             | -3.06 | 9.29.E-03 |
| 7791   | ZYX      | zyxin                                                                            | 3.06  | 9.44.E-03 |
| 5446   | PON3     | paraoxonase 3                                                                    | -3.05 | 9.50.E-03 |
| 10457  | GPNMB    | glycoprotein (transmembrane) nmb                                                 | 3.05  | 9.55.E-03 |

|       |        |                                                              |       |           |
|-------|--------|--------------------------------------------------------------|-------|-----------|
| 23643 | LY96   | lymphocyte antigen 96                                        | 3.05  | 9.54.E-03 |
| 23646 | PLD3   | phospholipase D family, member 3                             | 3.05  | 9.66.E-03 |
| 51135 | IRAK4  | interleukin-1 receptor-associated kinase 4                   | 3.04  | 9.79.E-03 |
| 6300  | MAPK12 | mitogen-activated protein kinase 12                          | -3.04 | 9.82.E-03 |
| 391   | RHOG   | ras homolog family member G                                  | 3.04  | 9.88.E-03 |
| 3759  | KCNJ2  | potassium channel, inwardly rectifying subfamily J, member 2 | 3.03  | 9.93.E-03 |
